1 **Interplay between medial nuclear stalling and lateral cellular flow underlies**  
2 **cochlear duct spiral morphogenesis**

3

4 Mamoru Ishii<sup>1</sup>, Tomoko Tateya<sup>2</sup>, Michiyuki Matsuda<sup>1,3</sup>, Tsuyoshi Hirashima<sup>\*3,4</sup>

5

6

7 1. Laboratory of Bioimaging and Cell Signaling, Graduate School of Biostudies, Kyoto  
8 University

9 2. Department of Speech and Hearing Sciences and Disorders, Faculty of Health and Medical  
10 Sciences, Kyoto University of Advanced Science

11 3. Department of Pathology and Biology of Diseases, Graduate School of Medicine, Kyoto  
12 University

13 4. Japan Science and Technology Agency, PRESTO

14

15

16

17 **Keywords:** Differential growth, FRET imaging, Interkinetic nuclear migration, MAPK/ERK,  
18 Mathematical model, Morphogenesis, Spiral pattern formation

19

20

21

22

23 **\*Corresponding author:** Tsuyoshi Hirashima, Ph.D

24

25 Graduate School of Biostudies, Kyoto University

26 Yoshida-Konoe-cho, Sakyo-ku, Kyoto 606-8501, Japan

27 Phone: +81-75-753-9450, Fax: +81-75-753-4655

28 [hirashima.tsuyoshi2m@kyoto-u.ac.jp](mailto:hirashima.tsuyoshi2m@kyoto-u.ac.jp)

29

30

31

32

33

34 **Abstract**

35

36 A notable example of spiral architecture in organs is the mammalian cochlear duct, where the  
37 duct morphology is critical for hearing function. Molecular genetics has revealed the necessary  
38 signaling molecules for the formation of spirals in organs, but it remains unclear how cellular  
39 dynamics generate bending and coiling of the cochlear duct during development. Here we show  
40 two modes of multicellular dynamics underlying the morphogenetic process by combining  
41 deep tissue live-cell imaging, Förster resonance energy transfer (FRET)-based quantitation,  
42 and mathematical modeling. First, surgical separation of the cochlear duct revealed that  
43 bending forces reside primarily in the medial side of the duct. In the medial pseudostratified  
44 epithelium, we found that nuclei stall at the luminal side during interkinetic nuclear migration,  
45 which would cause the extension of the luminal side, thereby bending the duct. Second, long-  
46 term organ-scale FRET imaging of extracellular signal-regulated kinase (ERK) activity showed  
47 that helical ERK activation waves propagate from the duct tip concomitant with the reverse  
48 multicellular flow in the lateral side of the duct, resulting in advection-based duct elongation.  
49 We propose an interplay of distinct multicellular behaviors underpinning spiral morphogenesis  
50 in the developing cochlear duct.

51

52

## 53 Introduction

54

55 Spiral shapes are a widely occurring motif in many varied biological tissues and organisms,  
56 including shells, horns, and plants, but how spiral shapes form has remained unclear  
57 (Thompson, 1942). The general principle of spiral formation is differences in growth rate  
58 between the outer and inner tissue of the extending organ, with the growth rate of the outer  
59 tissue being faster than that of the inner one, which has been theoretically and experimentally  
60 demonstrated in shells and plants (Johnson et al., 2019; Raup and Michelson, 1965; Smyth,  
61 2016; Wada and Matsumoto, 2018). The cellular processes causing this differential tissue  
62 growth are different in each organ (Johnson et al., 2019; Saffer et al., 2017), and so identifying  
63 the organ-specific mechanisms underlying these differential tissue growth rates is crucial to  
64 understanding the developmental process of spiral morphogenesis.

65 An example of a spiral organ is the mammalian cochlear duct, which is a tonotopically  
66 organized auditory organ in the inner ear (Fig. 1A). During murine development, the cochlear  
67 duct, composed of epithelial cells, elongates, bends, and coils to form a spiral. The molecular  
68 basis for the morphogenesis of the cochlear duct has been the subject of several previous studies.  
69 Gene knockout studies have clarified that the elongation of the cochlear duct requires sonic  
70 hedgehog (SHH) signaling from the cochleovestibular ganglion in the conical central axis of  
71 the cochlea (Bok et al., 2013; Liu et al., 2010; Tateya et al., 2013), fibroblast growth factor  
72 (FGF) signaling of epithelial cells (Pauley et al., 2003; Pirvola et al., 2000; Urness et al., 2018,  
73 2015), and non-canonical Wnt–planar cell polarity (PCP) signaling of prosensory cells (Mao  
74 et al., 2011; Montcouquiol and Kelley, 2020; Qian et al., 2007; Saburi et al., 2008; Wang et al.,  
75 2005). Deletion of *Shh* expression leads to a shortening of the cochlear duct and a significant  
76 decrease in cell proliferation exclusively at the base region (Bok et al., 2013). In *Fgf10* null  
77 mutant mice, the cochlear duct is remarkably shorter, but cell proliferation is unaffected  
78 (Urness et al., 2015), suggesting that cell proliferation and other cellular processes regulate  
79 ductal outgrowth. From embryonic day (E) 14.5 onwards, the mediolateral active migration of  
80 prosensory cells, during which these cells intercalate radially with their neighbors (known as  
81 convergent extension), contributes to longitudinal duct extension in a Wnt–PCP pathway-  
82 dependent manner (Chen et al., 2002; Cohen et al., 2019; Driver et al., 2017; Yamamoto et al.,  
83 2009). This cell intercalation drives ductal elongation; however, it cannot explain the  
84 asymmetrical morphogenetic mode underlying the duct bending before E14.5. Although the  
85 underlying signaling pathways are well characterized, the physical cellular mechanisms  
86 underlying spiral morphogenesis of the cochlear duct remain elusive. In the present study, we

87 aimed to identify the multicellular dynamics giving rise to the bending and coiling of the  
88 developing cochlear duct using a combination of live cell-imaging, FRET quantitation, and  
89 mathematical modeling.

90

91

## 92 **Results**

93

### 94 **The medial epithelial layer causes cochlear duct bending**

95 Mediolateral asymmetry characterizes the spiral form of the cochlear duct (Fig. 1A). We  
96 therefore first examined the force balance between the medial and the lateral tissue by  
97 surgically separating the cochlear duct along the lateral side of the hair cells (Fig. 1B); the  
98 medial side included Kölliker's organ and the prosensory domain, and the lateral side included  
99 the outer sulcus after separation. This manipulation led to the release of the mechanical stress  
100 affected mutually between the medial and the lateral tissue, enabling us to inspect the internal  
101 stresses of local tissues. The separated medial tissue curled much more after separation than  
102 before, while the lateral tissue was relatively uncurled (Fig. 1C and Mov. 1), indicating that  
103 active bending force are applied from the medial side, but not from the lateral side.

104 We next examined the morphology of the developing cochlear duct from E12.5 to E14.5  
105 by staining an epithelial marker, E-cadherin, and performing organ-scale 3D imaging. During  
106 this developmental period, the cochlear duct elongates and coils without changes to the  
107 mediolateral width (Fig. 1D). The curvature and thickness of the epithelial layer are  
108 significantly larger on the medial side than on the lateral side in a horizontal section of the roof-  
109 floor axis (Fig. 1D). Hereafter, we refer to the epithelial layers on the medial and lateral sides  
110 as the medial and lateral epithelial layers (MEL and LEL), respectively (Fig. 1E).  
111 Morphological quantification revealed that the curvature and thickness of the MEL are highest  
112 at a point more than 100  $\mu\text{m}$  away from the tip of the duct along the MEL (Fig. 1F and S1). In  
113 contrast, the curvature and thickness of the LEL remain constant (Fig. 1F and S1). These  
114 observations prompted us to explore the structure and dynamics of the MEL at single cell  
115 resolution.

116 Zooming in the epithelial layer clarified that most of the nuclei in the LEL align within a  
117 few nucleus diameters of each other ( $\sim 20 \mu\text{m}$ ) (Fig. 1G, left). However, nuclei in the MEL  
118 distribute broadly across a  $\sim 50 \mu\text{m}$  range, and mitotic cell rounding only occurs on the luminal  
119 side of the MEL (Fig. 1G, right). We also found that nuclei that stained positive for the M phase  
120 marker phospho-histone H3 (pHH3) were localized only on the luminal side of the epithelial

121 layers, while nuclei in the S phase cells labeled with a short pulse of ethynyl deoxyuridine  
 122 (EdU) were distributed predominantly on the basal side (Fig. 1H). Mosaic cell labeling  
 123 revealed that single cell bridges extended between the luminal and basal edges of the MEL via  
 124 long protrusions (Fig. 1I), clearly indicating that the MEL is a proliferative pseudostratified  
 125 epithelial tissue.  
 126

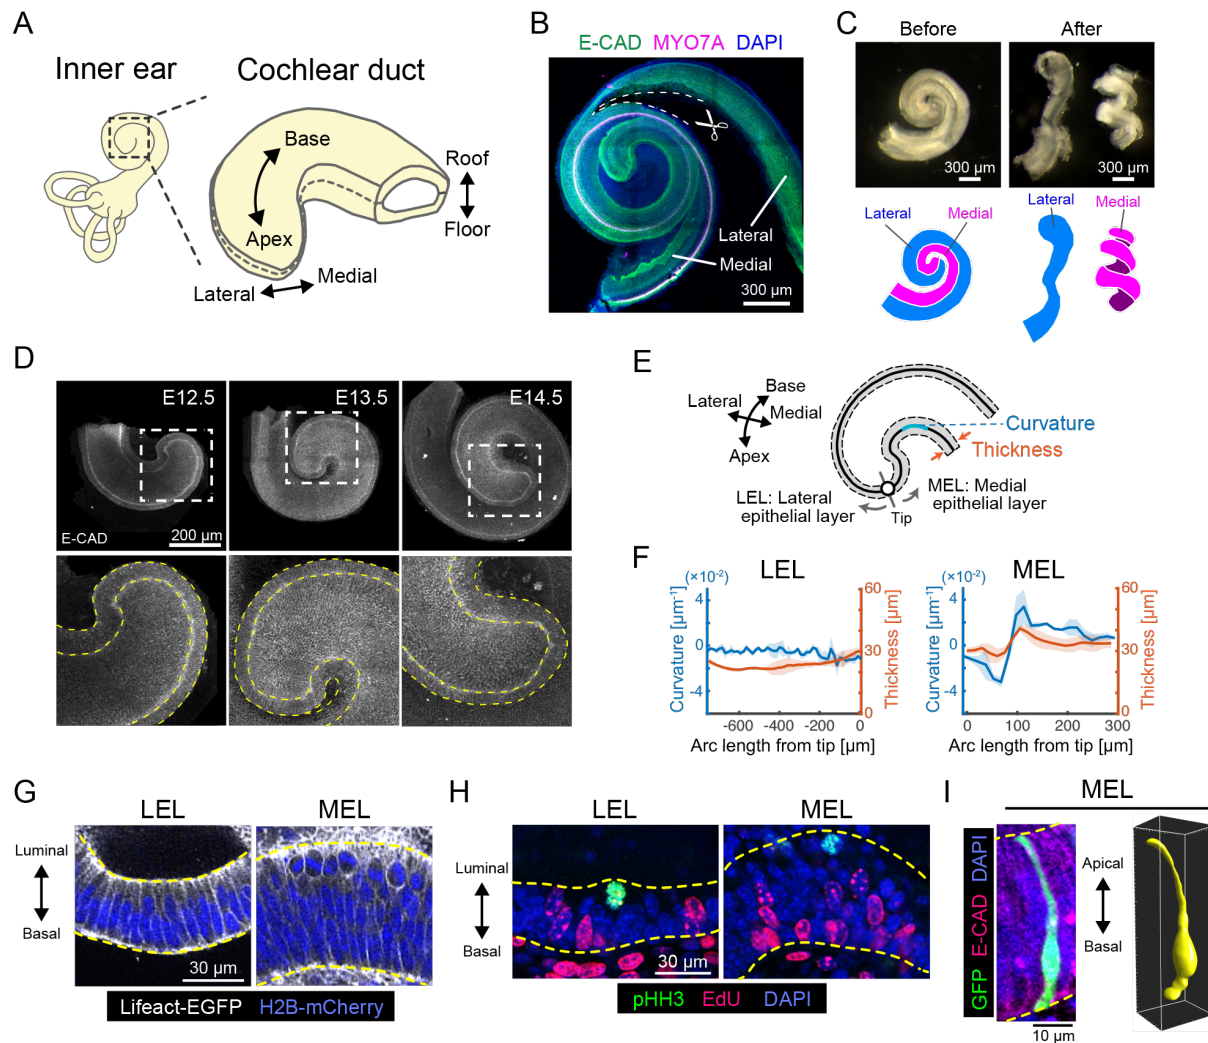

127  
 128

129 **Figure 1 The pseudostratified medial epithelial layer curves in the cochlear duct**  
 130 (A) Schematic diagrams showing the tissue axis and labels of the cochlear duct. (B)  
 131 Immunofluorescence image of anti-E-cadherin (green) and anti-Myosin VIIA, a marker for  
 132 sensory hair cells (magenta), with nuclear counterstaining using DAPI (blue) in the cochlea at  
 133 E17.5 during tissue separation, with cuts represented by dashed lines. N=3 was confirmed.  
 134 Scale bar, 300 µm. (C) Images of the cochlear duct before and after tissue separation.  
 135 Stereomicroscope images (upper) and the corresponding illustrations of the lateral (blue, left)  
 136 and medial (magenta, right) layers. N=3 was confirmed. Scale bar, 300 µm. (D)  
 137 Immunofluorescence images of anti-E-cadherin staining in the murine developing cochlea. The  
 138 lower rows are magnified images of the dotted squares in the upper rows. Yellow dotted lines  
 139 represent the edges of the epithelial layer. Scale bar, 200 µm. (E) Schematic diagram showing

140 regions used for morphological quantification. (F) Curvature and thickness as a function of the  
141 arc length from the tip along the lateral epithelial layer (LEL, left) and the medial epithelial  
142 layer (MEL, right) at E12.5. Mean  $\pm$  standard deviation (s.d.) N=3. (G) Images of Lifeact-  
143 EGFP (white) and H2B-mCherry (blue) showing cell shape and nuclear position in the LEL  
144 and MEL. Yellow dotted lines represent the luminal and basal edges. Scale bar, 30  $\mu$ m. (H)  
145 Fluorescence labeling images of anti-pHH3 (green) and EdU (magenta) with nuclear  
146 counterstaining using DAPI (blue) in the LEL and MEL. Yellow dotted lines represent the  
147 luminal and basal edges. Scale bar, 30  $\mu$ m. (I) Fluorescence image of GFP transfected cells  
148 labelling single cells (green) and anti-E-cadherin (magenta) with nuclear counterstaining using  
149 DAPI (blue) in the MEL (left) and the corresponding 3D rendered image (right). Yellow dotted  
150 lines on the left represent the luminal and basal edges. Scale bar, 10  $\mu$ m.

151

152

### 153 **Luminal nuclear stalling promotes MEL bending**

154 We next focused on the cellular dynamics in the MEL with a two-photon microscope. For live  
155 imaging of the MEL, the outer cartilaginous shell that will develop into the bony labyrinth was  
156 completely removed to expose the cochlear duct prior to *ex vivo* culture. We used a reporter  
157 mouse line ubiquitously expressing fluorescence proteins localized in the cytoplasm, allowing  
158 us to recognize the nuclei as the regions without fluorescence, as well as the luminal and basal  
159 edges of MEL in the pseudostratified epithelium. We observed differences in the nuclear  
160 movement between the flat region proximal to the tip of the apex and the curved region distal  
161 to the tip of apex (Fig. 2A, Mov. 2). The nuclei moved to the luminal edge of the epithelial  
162 layer before cell division, and after cell division the daughter nuclei returned to the basal side  
163 in the flat region (Fig. 2B). In the curved region, however, the cell nuclei remained at the  
164 luminal side even after cell division (Fig. 2C). To make this difference clearer, we tracked the  
165 nuclei and quantified their distance from the luminal edge at 3 hours after nuclear division.  
166 After classifying the tissue into two categories – flat and curved – based on the half-maximal  
167 curvature (Fig. 2D), fewer nuclei move to the basal side in the curved region than in the flat  
168 region (Fig. 2D'), suggesting that there are two different modes of luminal-basal nuclear  
169 movement in the MEL, depending on the distance from the duct tip. In addition, we examined  
170 two angles of cell division orientation,  $\phi$  and  $\theta$ , in the 3D polar coordinates from the live  
171 imaging data, with  $\phi$  and  $\theta$  representing the zenith and azimuth angle, respectively (Fig. 2E).  
172 The  $\phi$  angle was between  $0^\circ$  to  $45^\circ$ , indicating that cell division mostly occurs in parallel to the  
173 luminal surface of the MEL (Fig. 2F). The distribution of  $\theta$  shows that most cells divide along  
174 the apex-base axis rather than along the roof-floor axis (Fig. 2G), suggesting that the orientation  
175 of cell division contributes to the apex-base local expansion of the luminal side of the MEL.

176 Luminal-basal nuclear movement in the flat region exhibits the behavior known as  
177 interkinetic nuclear migration (IKNM), which has been observed in various pseudostratified  
178 epithelia (Grosse et al., 2011; Kosodo et al., 2011; Meyer et al., 2011; Norden et al., 2009;  
179 Sauer, 1935). During this process, nuclei at the basal side move close to the luminal surface  
180 prior to mitosis, and the daughter nuclei move back to the basal side, which results in even  
181 growth within the epithelial layer (Fig. 2H, upper). This mode of nuclear migration would not  
182 necessarily result in bending of the epithelial tissue. In contrast, lack of basalward movement  
183 during IKNM, which we refer to as ‘luminal nuclear stalling’ hereafter, results in asymmetric  
184 one-way flux of nuclei from the basal side to the luminal surface of the layer, which results in  
185 local cell crowding and expansion due to the division occurring at the luminal side (Fig. 2H,  
186 lower). This asymmetrical IKNM, along with oriented cell division, may contribute to  
187 differential growth between the luminal and basal sides of the MEL, and thus cause the physical  
188 bending of the MEL.

189 To test this possibility, we built a cell-based mechanical model and examined whether  
190 nuclear movements affect the curvature of an epithelial layer. Single epithelial cells in the layer  
191 were represented as polygons with vertices consisting of the luminal and basal edges, which  
192 could deform according to the cell cycle-dependent nuclear position, based on mechanical  
193 interactions between neighboring cells (Fig. 2I). We then introduced a parameter  $\gamma$   
194 controlling the degree of basalward movement after IKNM – the nucleus moves to the basal  
195 edge when  $\gamma = 1$  and stays at the luminal side when  $\gamma = 0$ . Our mathematical simulation  
196 demonstrated that the curvature of the epithelial layer monotonically decreases as a function of  
197  $\gamma$  (Fig. S2A), which supports our observation that luminal nuclear stalling mechanically  
198 contributes to bending of the epithelial layer. We used an *in silico* experiment to predict that  
199 cell cycle arrest at the S-phase entry would decrease the curvature of the MEL (Fig. 2J, 2K,  
200 and Mov. 3). This prediction was validated by treating explant cochlea with the DNA synthesis  
201 inhibitor Mitomycin C. After 1 day of treatment with 10  $\mu$ M Mitomycin C, EdU-positive S  
202 phase cells were no longer detected in the cochlea (Fig. S2B). Under these conditions, the  
203 amount of curvature along the MEL was significantly decreased in the curved region (Fig. 2L  
204 and 2M), which is consistent with the model prediction. These results corroborate our  
205 hypothesis that luminal nuclear stalling after luminal mitosis promotes MEL bending.

206  
207

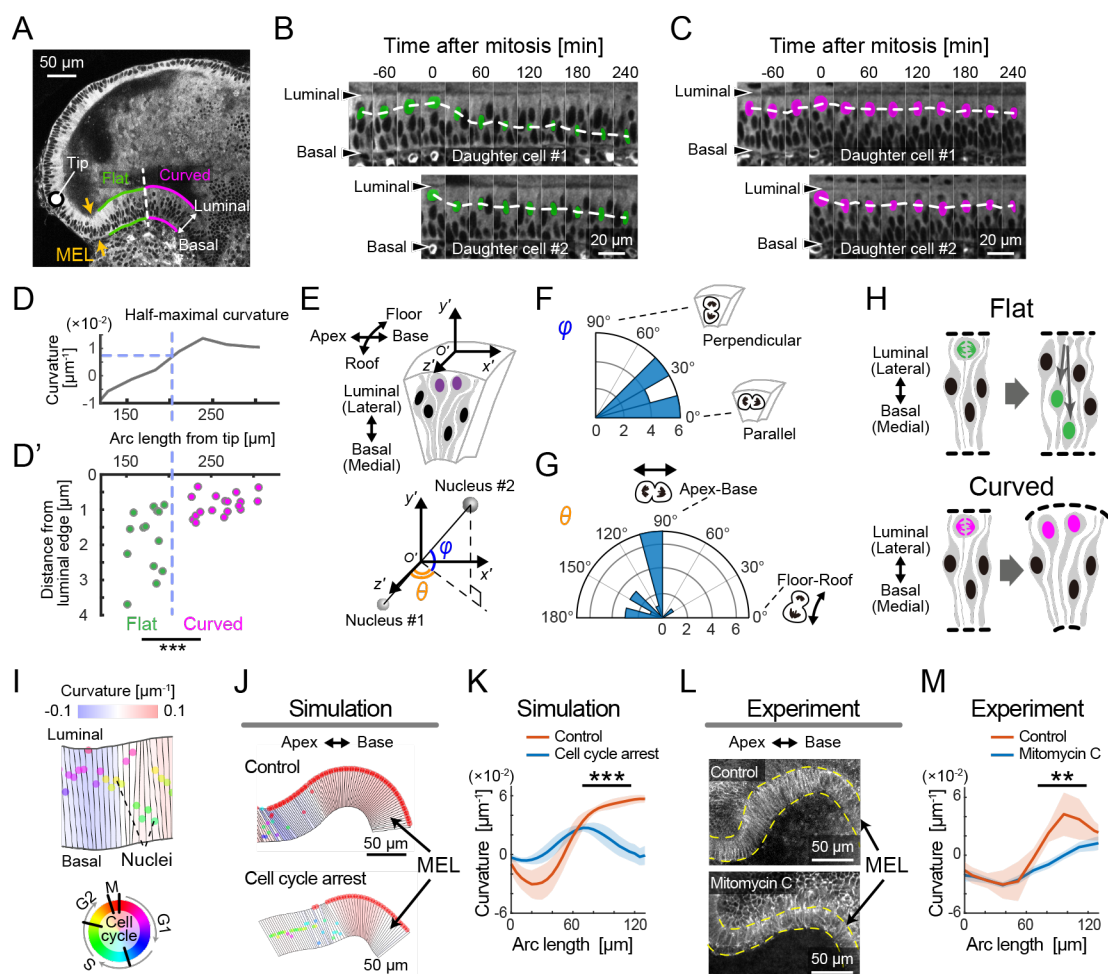

208

209

210 **Figure 2 Live imaging and mathematical modelling demonstrate that luminal nuclear**  
 211 **stalling promotes MEL bending via luminal-basal differential growth**

212 (A) Image of a section of an E14.5 cochlea in cytoplasmic reporter mice (CFP channel of ERK-  
 213 FERT mice). The MEL was classified into flat (green) and curved (magenta) regions and the  
 214 boundary between the flat and curved regions is indicated by a dotted line. The circle indicates  
 215 the duct tip. Scale bar, 50  $\mu\text{m}$ . (B, C) Kymographic images of the flat region (B) and the curved  
 216 region (C). Dotted lines denote a change in position of manually marked nuclei over time. Scale  
 217 bars, 20  $\mu\text{m}$ . (D, D') For 16 nuclear divisions that could be tracked, the distance from the  
 218 luminal edge 3 hours after nuclear division was plotted over the arc length from the tip (D')  
 219 together with the MEL curvature (D). At half-maximal curvature (D), the samples in (D') were  
 220 classified into two groups, i.e., flat ( $n=14$ ) and curved ( $n=18$ ). Mann–Whitney U test,  
 221  $p=0.00038$ . (E) Nuclear division orientation is represented by two angles,  $\varphi$  and  $\theta$ , in the polar  
 222 coordinate  $O'$ . (F, G) Angle distribution of  $\varphi$  and  $\theta$ .  $n=16$ . Rayleigh test,  $p=0.00096$  for (F) and  
 223  $p=0.15$  for (G). (H) Schematics for the expected morphology depending on the mode of nuclear  
 224 movement. IKNM would lead to the flat (upper) and asymmetric IKNM would lead to the  
 225 curved (lower). (I) Virtual epithelial layer in the model simulation. The colored circles denote  
 226 nuclei with the cell cycle state represented in the bottom. (J, K) Model prediction in the cell  
 227 cycle arrest before S phase entry in the growing virtual MEL. Representative images (J) and  
 228 the curvature over the arc length (K). Mean  $\pm$  s.d.  $N=10$ . Mann–Whitney U test,  $p<0.001$ . Scale  
 229 bar, 50  $\mu\text{m}$ . (L, M) The effect of mitomycin C treatment. Representative images of resultant  
 230 cochlear duct immunostaining of anti-E-cadherin (J) and the curvature over the arc length (M).



231 Mean  $\pm$  s.d. N=3. Mann–Whitney U test,  $p=0.0017$ . Scale bar, 50  $\mu\text{m}$ .

232

233

234 **Spatial heterogeneity of cell proliferation suggests cellular inflow to the lateral side of the**  
235 **apex to realize cochlear bending**

236 One plausible mechanism for achieving the spiral morphology of the cochlear duct is MEL-  
237 driven differential growth, but another possibility is that cell proliferation might occur at a  
238 faster rate on the lateral side than on the medial side. To address this, we examined the spatial  
239 distribution of proliferating cells within 30 min of labeling of EdU on the roof and floor side  
240 of the cochlear duct (Fig. 3A and 3B). For quantification, the image domain of the cochlear  
241 duct was divided into interrogation regions and the averaged fluorescence intensity of labelled  
242 EdU was measured within each region (Fig. 3C). On the floor side, EdU-positive cells were  
243 more abundant in the medial side than in the lateral side around the apex (arrows, Fig. 3B and  
244 3D, left). However, on the roof side of the cochlear duct, EdU-positive cells were distributed  
245 evenly, with slightly fewer cells at the base than at the apex and without a significant bias along  
246 the mediolateral axis (Fig. 3B and 3D, right). These observations negate the possibility that cell  
247 proliferation rates on the lateral side of the cochlear duct could drive mediolateral differential  
248 tissue growth and cause duct bending. The spatial map of EdU intensity shows that cell  
249 proliferation rates were higher in the floor-base region (arrowheads, Fig. 3B and 3D, left).  
250 Supposing that cell proliferation is the main driver of local tissue growth, the higher volumetric  
251 growth observed in the medial side than in the lateral side would contribute to the duct bending  
252 inward at the lateral side, which contradicts the innate cochlear morphogenesis. We thus  
253 hypothesized that the cells in the lateral side of the growing apex may be supplied by  
254 proliferation ‘hot spot’ in the basal region of the cochlear duct, which could resolve the  
255 observed mismatch between tissue growth rates in the medial and lateral sides of the duct.

256

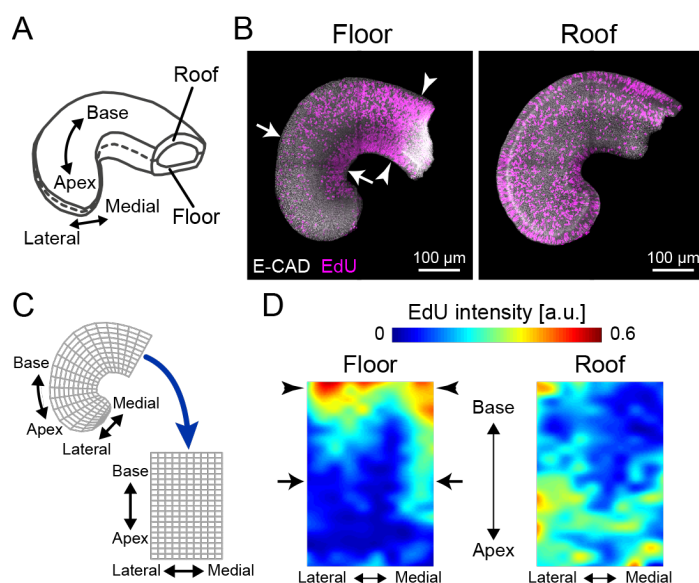

257

258

259 **Figure 3 Cell proliferation mapping suggests cellular inflow to the lateral side of the**  
260 **cochlear duct apex to realize cochlear bending**

261 (A) Schematic of tissue axis of the cochlear duct. (B) Maximum projection images of stained  
262 anti-E-cadherin (white) and EdU (magenta) in the roof and floor region of cochlear duct at  
263 E12.5. Representative images showing EdU signals in the cochlear duct are shown. Arrows  
264 indicate the region of EdU signal gradient from the medial to the lateral side of the duct.  
265 Arrowheads indicate the base region where the EdU intensity is concentrated. Scale bar, 100  
266  $\mu\text{m}$ . (C) Regional mapping from irregular grids in the cochlear duct to regular grids. (D) Heat  
267 map of EdU intensity in the roof and floor region of the duct. Arrows and arrowheads are the  
268 same as in (B). N=3 was confirmed.  
269

270

271 **Retrograde helical ERK activation waves drive base-to-apex multicellular flow**

272 How are cells supplied from the base of the cochlear duct to the lateral side? Earlier studies  
273 reported that FGF signaling is critical for cochlear duct outgrowth (Pirvola et al., 2000; Urness  
274 et al., 2015). We therefore focused on ERK MAP kinase, a downstream kinase in the FGF  
275 signaling pathway, and used a reporter mouse line that ubiquitously expresses a Förster  
276 resonance energy transfer (FRET)-based biosensor for ERK activity in the cytosol (Harvey et  
277 al., 2008; Komatsu et al., 2018, 2011). 3D FRET imaging using two-photon microscopy  
278 revealed that ERK is preferentially activated in the lateral-roof side of the cochlear duct,  
279 including the outer sulcus and stria vascularis (Fig. 4A, 4A', and Mov. 4), which is consistent  
280 with the previously reported distribution of *Fgfr2* expression (Urness et al., 2015).

281 For continuous observation during ductal outgrowth, we established an explant culture  
282 method in which the capsule above the duct tip was partially removed, allowing 3D organ-  
283 scale long-term imaging of ERK activity. Surprisingly, the time-lapse images of the cochlea

284 dissected at E12.5 revealed that ERK activation propagates intercellularly as oscillatory waves  
285 from the apex to the base of the floor side (Fig. 4B and Mov. 5), while ERK is constitutively  
286 activated around the ductal tip of the roof side (Fig. S3A and S3B). We next quantified  
287 multicellular tissue flow by particle image velocimetry (PIV) at the supra-cellular (4–5 cell  
288 length) scale, and found that cells coherently move as clusters of  $\sim 100 \mu\text{m}$  diameter from the  
289 base to the apex of the floor side, again as oscillatory waves, and similarly to the ERK  
290 activation waves of the floor side (Fig. 4C and Mov. 5). In the roof side, the multicellular tissue  
291 flows directly toward the direction of elongation around the duct tip (Fig. S3C). Kymography  
292 of ERK activity along the apex-base line of the lateral-floor side (Fig. 4D) shows oscillatory  
293 retrograde ERK activity waves (Fig. 4E and Fig. S3D), which proceed at a speed of  $0.42 \pm$   
294  $0.078 \mu\text{m min}^{-1}$  (mean  $\pm$  standard deviation) in space-fixed coordinates (Fig. 4F).

295 Since ERK activation can be induced by cell extension during collective cell migration  
296 (Hino et al., 2020), we further calculated the ERK activity rate, i.e., the time derivative of ERK  
297 activity, and the extension-shrinkage rate, i.e., the local tissue strain rate along the apex-base  
298 line, by using time-series data of ERK activity and PIV speed, respectively (Fig. S3E). We  
299 found that both the ERK activity rate and the extension-shrinkage rate oscillate across the time  
300 course (Figure 4G). Moreover, cross-correlation analysis revealed that the local tissue  
301 deformation, represented by the extension-shrinkage rate, precedes ERK activity changes by  
302 24 min on average (Fig. 4H). This is consistent with a regime of mechano-chemical coupling  
303 for collective cell migration: extension-triggered ERK activation promotes cell contraction,  
304 pulling the neighboring cells, which eventually evokes another round of ERK activation in the  
305 neighboring cells (Boocock et al., 2020; Hino et al., 2020). The observed lag time between the  
306 ERK activity rate and the extension-shrinkage rate can be reproduced using a minimal  
307 mathematical model of the mechano-chemical coupling, but not by an uncoupling model under  
308 which the ERK activation waves regulate the cell deformation unidirectionally, supporting the  
309 plausibility of mechano-chemical coupling rather than an uncoupling regime (Fig. S4). The  
310 role played by ERK was confirmed by treating the cochlear duct with an inhibitor of the  
311 upstream kinase MEK, PD0325901. Treatment with the MEK inhibitor at  $1 \mu\text{M}$  resulted in a  
312 significant decrease of the tissue flow speed (Fig. 4I) as well as ERK inactivation (Fig. S3F),  
313 corroborating that ERK activation waves contribute to the base-to-apex multicellular tissue  
314 flow.

315 Finally, we extended the analysis to 3D dynamics of ERK activity and cell movement in  
316 the developing cochlear duct. Surface rendering of the ERK activity map in the cytosol  
317 indicated that ERK activity peaks shift from the apex-roof to the base-floor in the lateral side

318 of the cochlear duct (Fig. 4J and Mov. 6). Concomitantly with helical ERK activity waves,  
 319 coherent cell movements can be observed from the base-floor to the apex-roof in the opposite  
 320 direction to the ERK waves (Mov. 6). This observation strongly suggests that ERK-mediated  
 321 helical collective cell movement could drive 3D duct coiling underlying the spiral  
 322 morphogenesis of the cochlear duct (Fig. 4K).  
 323  
 324

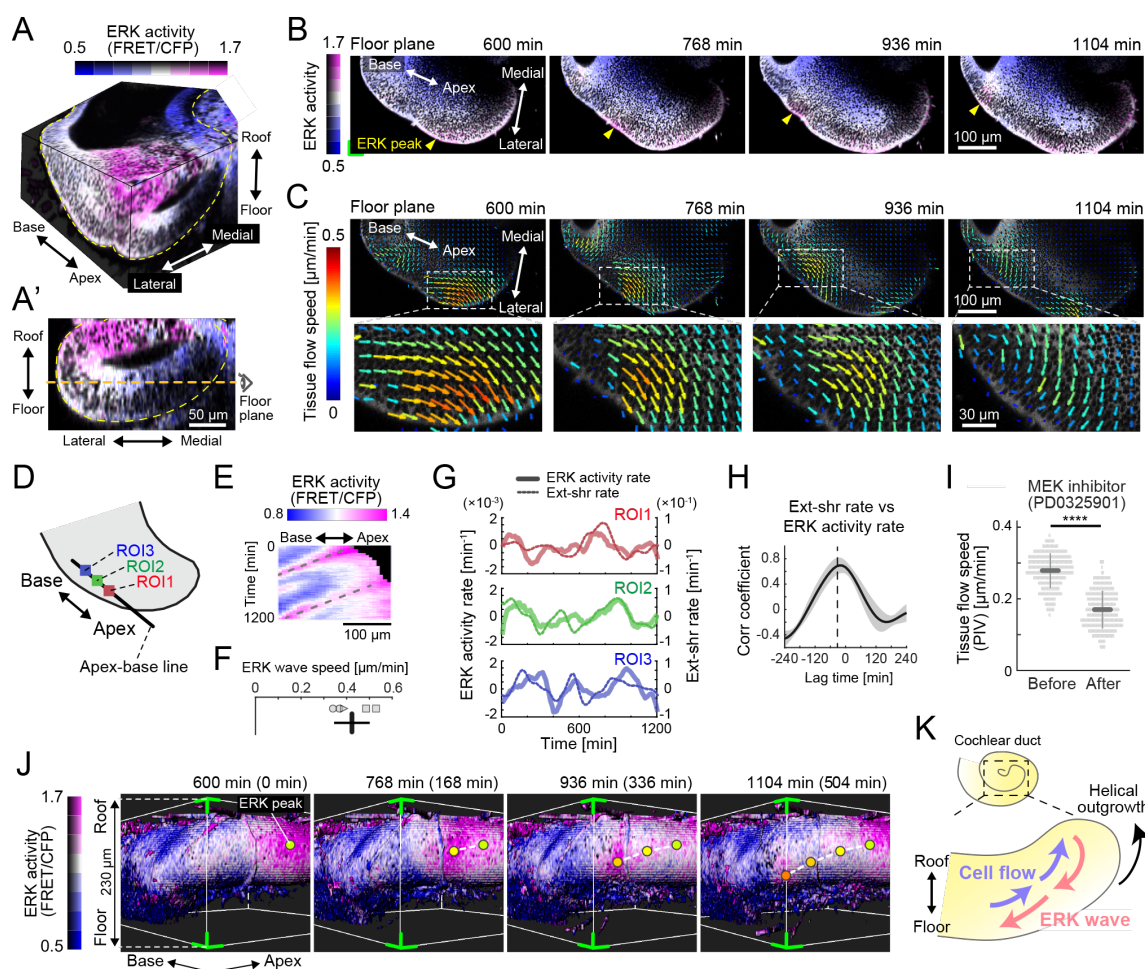

325  
 326

327 **Figure 4 Retrograde helical ERK activation waves drive base-to-apex multicellular flow**  
 328 (A) 3D ERK activity map in the cochlear duct at E12.5. (A') Cross section view (medial-lateral  
 329 and roof-floor plane) of (A). Orange dotted line indicates the floor plane shown in (B) and (C).  
 330 Scale bar, 50  $\mu\text{m}$ . (B) Time-lapse snapshots of ERK activity maps in the floor plane. Time  
 331 indicates the elapsed time of live imaging. Yellow arrowheads indicate the ERK activity peak.  
 332 Scale bar, 100  $\mu\text{m}$ . (C) Time-lapse snapshots of tissue flow speed obtained by PIV in the floor  
 333 plane. Scale bar, 100  $\mu\text{m}$ . (D) Schematic diagram showing the axis, the apex-base line for  
 334 kymography, and regions of interests (ROIs). (E) Representative kymograph of ERK activity.  
 335 The horizontal axis indicates the position on the apex-base line shown in (D) and the vertical  
 336 axis indicates the elapsed time of live imaging. Dotted lines represent oscillatory waves from  
 337 the apex to the base. Scale bar, 100  $\mu\text{m}$ . (F) ERK wave speed with mean and s.d.  $n=5$  from

338 N=3. (G) Time-series ERK activity rate and extension-shrinkage rate in representative 3  
339 different ROIs. (H) Cross-correlation between the extension-shrinkage rate and ERK activity  
340 rate.  $n=12$ . Mean  $\pm$  s.d. (I) Tissue flow speed before and after MEK inhibitor PD0325901  
341 treatment at  $1 \mu\text{M}$ .  $n=285$  from  $N=3$ . Two-sample t-test,  $p<0.001$ . (J) Time-lapse snapshots of  
342 surface rendered ERK activity maps in the cochlear duct at E12.5. The green corners  
343 correspond to the green corner on the images shown in (B) and viewed from the left-bottom  
344 corner of (B). Circles indicate the position of ERK activity peaks and the connecting dotted  
345 lines indicate a trace of the peak shift. The time scale is the same as in (B). (K) Schematics for  
346 the ERK activity waves and cell flow.

347

348

## 349 **Discussion**

350

351 Previous genetic studies have revealed the molecular basis of cochlear duct elongation during  
352 development, but have been unable to explain the physical mechanisms by which the duct  
353 bends because of its severe phenotype (Bok et al., 2013; Groves and Fekete, 2012; Urness et  
354 al., 2018, 2015). Motivated by these earlier studies, we have visualized the cochlear duct  
355 development by two-photon microscopy and found that nuclei moving from the basal side stall  
356 at the luminal side after cell division, which gives rise to bending via differential tissue growth  
357 between the luminal and basal sides of MEL. We also elucidated that coherent cellular flow  
358 occurs from the base to the apex exclusively in the lateral wall of the growing cochlear duct,  
359 which is accompanied by retrograde ERK activation waves. Thus, our long-term deep tissue  
360 imaging has illuminated unprecedented dynamics of cells and kinase activity underpinning the  
361 bending of developing cochlear duct.

362 We showed that the mode of luminal-basal nuclear migration switches at a position in the  
363 continuous pseudostratified epithelium (Fig. 2D'), which controls the curvature of the MEL  
364 (Fig. 2J-M). To our knowledge, we have provided the first experimental evidence that nuclei  
365 stall at the luminal side of the pseudostratified epithelium during IKNM in normal development  
366 (Norden, 2017). The luminal nuclear stalling results in luminal expansion, to some extent,  
367 because of physical space occupation even in the curved pseudostratified epithelium, while it  
368 remains unclear whether the luminal nuclear stalling results from the MEL curvature, i.e., the  
369 convexity of the luminal side. Therefore, we propose luminal expansion driven by luminal  
370 nuclear stalling as a mechanism for sculpting curves in pseudostratified epithelium, in addition  
371 to the actomyosin-based basal shrinkage that has been previously reported in zebrafish  
372 neuroepithelium (Sidhaye and Norden, 2017; Yanakieva et al., 2019). One important remaining  
373 question is what causes the space-dependent mode transition of nuclear movement in the  
374 continuous tissue. It has been previously shown that knock-down of cell-surface TAG-1

375 (transient axonal glycoprotein-1) impedes basalward nuclear movement during IKNM in the  
376 mouse ventricular zone, which ultimately leads to overcrowding of neural progenitor cells in  
377 the luminal side, and a severe cortical dysplasia (Okamoto et al., 2013). It has been proposed  
378 that cytoskeletal machinery, including actomyosin and microtubules, regulates basalward  
379 nuclear movement (Kosodo et al., 2011; Norden, 2017; Norden et al., 2009). This provides an  
380 important basis for the identification of the molecules responsible for the nuclear behavior in  
381 the MEL at the supra-cellular level, which needs to be clarified in the future. In addition,  
382 unknown factors providing these molecules with positional information should be explored to  
383 understand the mode transition of nuclear movement at the tissue level.

384 In the present study, the establishment of long-term imaging techniques and biosensors  
385 for protein kinase activity has led to the discovery of unexpected spatiotemporal patterns of  
386 cell movement and ERK activity in the developing cochlear duct. Previously, we and others  
387 have observed intercellular ERK activation waves in the epithelium, such as migrating Madin-  
388 Darby canine kidney (MDCK) cells (Aoki et al., 2017; Hino et al., 2020), developing  
389 *Drosophila* tracheal placode (Ogura et al., 2018), and wounded murine skin (Hiratsuka et al.,  
390 2015). We have also proposed an ERK-mediated mechanochemical feedback system, in which  
391 cell extension activates ERK followed by ERK-triggered cell contraction (Boockook et al., 2020;  
392 Hino et al., 2020), which can explain the symphony between cell movement and ERK activity.

393 The ERK activation wave speed in the developing cochlear duct was  $0.42 \mu\text{m min}^{-1}$  (Fig.  
394 4F), which is significantly slower than in MDCK cells and wounded mouse epidermis, where  
395 it proceeds at  $2.5 \mu\text{m min}^{-1}$  and  $1.4 \mu\text{m min}^{-1}$ , respectively (Aoki et al., 2017; Hino et al., 2020;  
396 Hiratsuka et al., 2015). Interestingly, when normalized to the cell lengths of the developing  
397 cochlear duct ( $4 \mu\text{m}$ ), MDCK cells ( $20 \mu\text{m}$ ), and the basal cells of the mouse epidermis ( $10$   
398  $\mu\text{m}$ ), the wave speed of the developing murine cochlear duct, which is  $6 \text{ cells hr}^{-1}$ , is  
399 comparable with that of MDCK cells, which is  $7 \text{ cells hr}^{-1}$ , and that of wounded adult murine  
400 skin, which is  $8 \text{ cells hr}^{-1}$ . Our findings couple multicellular flow and ERK activation waves in  
401 the cochlea, corroborating the findings of earlier studies (Boockook et al., 2020; Hino et al.,  
402 2020), and supporting the existence of a general regulatory mechanism for collective cell  
403 migration during tissue morphogenesis.

404 Our 3D time-lapse imaging revealed coherent helical cell flow from the base-floor to the  
405 apex-roof of the lateral side of the cochlear duct. Cell flow analysis revealed that the rate of  
406 base-to-apex cell flow ( $0.24 \mu\text{m min}^{-1}$ , Fig. S3E) exceeds that of the duct elongation speed  
407 ( $0.13 \mu\text{m min}^{-1}$ , Mov. 5). Thus, the cell flow rate may be sufficient to compensate for the lateral  
408 tissue growth. We speculate that this ERK-mediated cell advection originating from the

409 heterogeneity of cell proliferation causes consistent mediolateral differential growth at the  
410 tissue scale, and results in cochlear bending. In support of this, knockout of *Shh* causes a  
411 significant decrease in the number of proliferating cells at the base of the cochlear duct, and  
412 causes the shortening of the cochlear duct (Bok et al., 2013). As SHH is secreted mainly from  
413 the spiral ganglions located in the central axis of the cochlea (Bok et al., 2013), further  
414 investigations on the interaction between the cochlear duct and these ganglions will provide a  
415 better understanding of cochlear morphogenesis.

416 Overall, we visualized multicellular behavior underlying the bending of the cochlear duct  
417 during development using deep tissue live imaging. This contributes to a better understanding  
418 of symmetry breaking in tissue morphogenesis during development and in generation of inner  
419 ear organoids (Koehler et al., 2017, 2013). The live imaging technique used in the present study  
420 forms the basis for further analysis of the interplay between morphogenesis and cell fate  
421 decisions during cochlear development (Cohen et al., 2019; Tateya et al., 2019).

422

423 **Acknowledgements**

424 This work was supported by the JSPS KAKENHI 17KT0107 and 19H00993, by the JST  
425 PRESTO JPMJPR1949 and CREST JPMJCR1654, and by the Medical Research Support  
426 Center of Kyoto University. We would like to thank Akane Kusumi for technical assistance,  
427 and Edouard Hannezo, Naoya Hino, and Yoshiko Takahashi for fruitful discussion.

428

429 **Author contributions**

430 Conceptualization, T.T., T.H.; Methodology, M.I., T.T., T.H.; Software, M.I., T.H.; Validation,  
431 M.I., T.H.; Formal analysis, M.I., T.H.; Investigation, M.I., T.H.; Resources, M.I., M.M., T.H.;  
432 Data curation, M.I., T.H.; Writing - original draft, M.I., T.H.; Writing - review & editing, T.T.,  
433 M.M., T.H.; Visualization, T.H.; Supervision, M.M., T.H.; Project administration, T.H.;  
434 Funding acquisition, M.M., T.H.

435

436 **Competing interests**

437 The authors declare no competing interests.

438

439



## 440 **References**

- 441
- 442 Abe T, Kiyonari H, Shioi G, Inoue KI, Nakao K, Aizawa S, Fujimori T. 2011. Establishment  
443 of conditional reporter mouse lines at ROSA26 locus for live cell imaging. *Genesis*  
444 **49**:579–590. doi:10.1002/dvg.20753
- 445 Aoki K, Kamioka Y, Matsuda M. 2013. Fluorescence resonance energy transfer imaging of  
446 cell signaling from in vitro to in vivo: basis of biosensor construction, live imaging, and  
447 image processing. *Dev Growth Differ* **55**:515–22. doi:10.1111/dgd.12039
- 448 Aoki K, Kondo Y, Naoki H, Hiratsuka T, Itoh RE, Matsuda M. 2017. Propagating Wave of  
449 ERK Activation Orients Collective Cell Migration. *Dev Cell* **43**:305-317.e5.  
450 doi:10.1016/j.devcel.2017.10.016
- 451 Bok J, Zenczak C, Hwang CH, Wu DK. 2013. Auditory ganglion source of Sonic hedgehog  
452 regulates timing of cell cycle exit and differentiation of mammalian cochlear hair cells.  
453 *Proc Natl Acad Sci U S A*. doi:10.1073/pnas.1222341110
- 454 Boocock D, Hino N, Ruzickova N, Hirashima T, Hannezo E. 2020. Theory of mechano-  
455 chemical patterning and optimal migration in cell monolayers. *bioRxiv*.  
456 doi:<https://doi.org/10.1101/2020.05.15.096479>
- 457 Chen P, Johnson JE, Zoghbi HY, Segil N. 2002. The role of Math1 in inner ear development:  
458 Uncoupling the establishment of the sensory primordium from hair cell fate  
459 determination. *Development*.
- 460 Cohen R, Amir-Zilberstein L, Hersch M, Woland S, Taiber S, Matsuzaki F, Bergmann S,  
461 Avraham KB, Sprinzak D. 2019. Shear forces drive precise patterning of hair cells in the  
462 mammalian inner ear. *bioRxiv*. doi:10.1101/707422
- 463 Driver EC, Northrop A, Kelley MW. 2017. Cell migration, intercalation and growth regulate  
464 mammalian cochlear extension. *Dev*. doi:10.1242/dev.151761
- 465 Fletcher AG, Osterfield M, Baker RE, Shvartsman SY. 2014. Vertex models of epithelial  
466 morphogenesis. *Biophys J* **106**:2291–2304. doi:10.1016/j.bpj.2013.11.4498
- 467 Grosse AS, Pressprich MF, Curley LB, Hamilton KL, Margolis B, Hildebrand JD, Gumucio  
468 DL. 2011. Cell dynamics in fetal intestinal epithelium: Implications for intestinal growth  
469 and morphogenesis. *Development*. doi:10.1242/dev.065789
- 470 Groves AK, Fekete DM. 2012. Shaping sound in space: The regulation of inner ear  
471 patterning. *Development*. doi:10.1242/dev.067074
- 472 Harvey CD, Ehrhardt AG, Cellurale C, Zhong H, Yasuda R, Davis RJ, Svoboda K. 2008. A  
473 genetically encoded fluorescent sensor of ERK activity. *Proc Natl Acad Sci U S A*.

- 474 doi:10.1073/pnas.0804598105
- 475 Hino N, Rossetti L, Marín-Llauradó A, Aoki K, Trepas X, Matsuda M, Hirashima T. 2020.
- 476 ERK-mediated mechanochemical waves direct collective cell polarization. *Dev Cell* **in**
- 477 **press**. doi:10.1101/2019.12.25.888552
- 478 Hirashima T, Adachi T. 2019. Polarized cellular mechano-response system for maintaining
- 479 radial size in developing epithelial tubes. *Development* **146**:dev181206.
- 480 doi:10.1242/dev.181206
- 481 Hirashima T, Adachi T. 2015. Procedures for the Quantification of Whole-Tissue
- 482 Immunofluorescence Images Obtained at Single-Cell Resolution during Murine Tubular
- 483 Organ Development. *PLoS One* **10**:e0135343. doi:10.1371/journal.pone.0135343
- 484 Hiratsuka T, Fujita Y, Naoki H, Aoki K, Kamioka Y, Matsuda M. 2015. Intercellular
- 485 propagation of extracellular signal-regulated kinase activation revealed by in vivo
- 486 imaging of mouse skin. *Elife* **2015**. doi:10.7554/eLife.05178
- 487 Johnson AB, Fogel NS, Lambert JD. 2019. Growth and morphogenesis of the gastropod
- 488 shell. *Proc Natl Acad Sci U S A*. doi:10.1073/pnas.1816089116
- 489 Koehler KR, Mikosz AM, Molosh AI, Patel D, Hashino E. 2013. Generation of inner ear
- 490 sensory epithelia from pluripotent stem cells in 3D culture. *Nature*.
- 491 doi:10.1038/nature12298
- 492 Koehler KR, Nie J, Longworth-Mills E, Liu XP, Lee J, Holt JR, Hashino E. 2017. Generation
- 493 of inner ear organoids containing functional hair cells from human pluripotent stem
- 494 cells. *Nat Biotechnol*. doi:10.1038/nbt.3840
- 495 Komatsu N, Aoki K, Yamada M, Yukinaga H, Fujita Y, Kamioka Y, Matsuda M. 2011.
- 496 Development of an optimized backbone of FRET biosensors for kinases and GTPases.
- 497 *Mol Biol Cell* **22**:4647–56. doi:10.1091/mbc.E11-01-0072
- 498 Komatsu N, Terai K, Imanishi A, Kamioka Y, Sumiyama K, Jin T, Okada Y, Nagai T,
- 499 Matsuda M. 2018. A platform of BRET-FRET hybrid biosensors for optogenetics,
- 500 chemical screening, and in vivo imaging. *Sci Rep*. doi:10.1038/s41598-018-27174-x
- 501 Kosodo Y, Suetsugu T, Suda M, Mimori-Kiyosue Y, Toida K, Baba SA, Kimura A,
- 502 Matsuzaki F. 2011. Regulation of interkinetic nuclear migration by cell cycle-coupled
- 503 active and passive mechanisms in the developing brain. *EMBO J*.
- 504 doi:10.1038/emboj.2011.81
- 505 Liu Z, Owen T, Zhang L, Zuo J. 2010. Dynamic expression pattern of sonic hedgehog in
- 506 developing cochlear spiral ganglion neurons. *Dev Dyn*. doi:10.1002/dvdy.22302
- 507 Mao Y, Mulvaney J, Zakaria S, Yu T, Morgan KM, Allen S, Basson MA, Francis-West P,

- 508 Irvine KD. 2011. Characterization of a *Dchs1* mutant mouse reveals requirements for  
509 *Dchs1*-*Fat4* signaling during mammalian development. *Development*.  
510 doi:10.1242/dev.057166
- 511 Mao Y, Tournier AL, Hoppe A, Kester L, Thompson BJ, Tapon N. 2013. Differential  
512 proliferation rates generate patterns of mechanical tension that orient tissue growth.  
513 *EMBO J* **32**:2790–2803. doi:10.1038/emboj.2013.197
- 514 Meyer EJ, Ikmi A, Gibson MC. 2011. Interkinetic nuclear migration is a broadly conserved  
515 feature of cell division in pseudostratified epithelia. *Curr Biol*.  
516 doi:10.1016/j.cub.2011.02.002
- 517 Montcouquiol M, Kelley MW. 2020. Development and patterning of the cochlea: From  
518 convergent extension to planar polarity. *Cold Spring Harb Perspect Med*.  
519 doi:10.1101/cshperspect.a033266
- 520 Nagai T, Honda H. 2001. A dynamic cell model for the formation of epithelial tissues. *Philos*  
521 *Mag Part B* **81**:699–719. doi:10.1080/13642810108205772
- 522 Norden C. 2017. Pseudostratified epithelia - cell biology, diversity and roles in organ  
523 formation at a glance. *J Cell Sci*. doi:10.1242/jcs.192997
- 524 Norden C, Young S, Link BA, Harris WA. 2009. Actomyosin Is the Main Driver of  
525 Interkinetic Nuclear Migration in the Retina. *Cell*. doi:10.1016/j.cell.2009.06.032
- 526 Ogura Y, Wen F-L, Sami MM, Shibata T, Hayashi S. 2018. A Switch-like Activation Relay  
527 of EGFR-ERK Signaling Regulates a Wave of Cellular Contractility for Epithelial  
528 Invagination. *Dev Cell* **46**:162-172.e5. doi:10.1016/j.devcel.2018.06.004
- 529 Okamoto M, Namba T, Shinoda T, Kondo T, Watanabe T, Inoue Y, Takeuchi K, Enomoto Y,  
530 Ota K, Oda K, Wada Y, Sagou K, Saito K, Sakakibara A, Kawaguchi A, Nakajima K,  
531 Adachi T, Fujimori T, Ueda M, Hayashi S, Kaibuchi K, Miyata T. 2013. TAG-1-  
532 assisted progenitor elongation streamlines nuclear migration to optimize subapical  
533 crowding. *Nat Neurosci*. doi:10.1038/nn.3525
- 534 Okuda S, Inoue Y, Eiraku M, Adachi T, Sasai Y. 2014. Vertex dynamics simulations of  
535 viscosity-dependent deformation during tissue morphogenesis. *Biomech Model*  
536 *Mechanobiol* **14**:413–425. doi:10.1007/s10237-014-0613-5
- 537 Pauley S, Wright TJ, Pirvola U, Ornitz D, Beisel K, Fritzsche B. 2003. Expression and  
538 function of FGF10 in mammalian inner ear development. *Dev Dyn*.  
539 doi:10.1002/dvdy.10297
- 540 Pirvola U, Spencer-Dene B, Xing-Qun L, Kettunen P, Thesleff I, Fritzsche B, Dickson C,  
541 Ylikoski J. 2000. FGF/FGFR-2(IIIb) Signaling Is Essential for Inner Ear

- 542 Morphogenesis. *J Neurosci* **20**:6125–6134. doi:10.1523/JNEUROSCI.20-16-  
543 06125.2000
- 544 Qian D, Jones C, Rzadzinska A, Mark S, Zhang X, Steel KP, Dai X, Chen P. 2007. Wnt5a  
545 functions in planar cell polarity regulation in mice. *Dev Biol*.  
546 doi:10.1016/j.ydbio.2007.03.011
- 547 Raup DM, Michelson A. 1965. Theoretical morphology of the coiled shell. *Science (80- )*.  
548 doi:10.1126/science.147.3663.1294
- 549 Riedl J, Flynn KC, Raducanu A, Gärtner F, Beck G, Bösl M, Bradke F, Massberg S, Aszodi  
550 A, Sixt M, Wedlich-Söldner R. 2010. Lifeact mice for studying F-actin dynamics. *Nat*  
551 *Methods*. doi:10.1038/nmeth0310-168
- 552 Saburi S, Hester I, Fischer E, Pontoglio M, Eremina V, Gessler M, Quaggin SE, Harrison R,  
553 Mount R, McNeill H. 2008. Loss of Fat4 disrupts PCP signaling and oriented cell  
554 division and leads to cystic kidney disease. *Nat Genet*. doi:10.1038/ng.179
- 555 Saffer AM, Carpita NC, Irish VF. 2017. Rhamnose-Containing Cell Wall Polymers Suppress  
556 Helical Plant Growth Independently of Microtubule Orientation. *Curr Biol*.  
557 doi:10.1016/j.cub.2017.06.032
- 558 Sauer FC. 1935. Mitosis in the neural tube. *J Comp Neurol* **62**:377–405.  
559 doi:10.1002/cne.900620207
- 560 Serra-Picamal X, Conte V, Vincent R, Anon E, Tambe DT, Bazellieres E, Butler JP,  
561 Fredberg JJ, Trepast X. 2012. Mechanical waves during tissue expansion. *Nat Phys*  
562 **8**:628–634. doi:10.1038/nphys2355
- 563 Sidhaye J, Norden C. 2017. Concerted action of neuroepithelial basal shrinkage and active  
564 epithelial migration ensures efficient optic cup morphogenesis. *Elife*.  
565 doi:10.7554/eLife.22689
- 566 Smyth DR. 2016. Helical growth in plant organs: Mechanisms and significance. *Dev*.  
567 doi:10.1242/dev.134064
- 568 Tateya T, Imayoshi I, Tateya I, Hamaguchi K, Torii H, Ito J, Kageyama R. 2013. Hedgehog  
569 signaling regulates prosensory cell properties during the basal-to-apical wave of hair cell  
570 differentiation in the mammalian cochlea. *Dev*. doi:10.1242/dev.095398
- 571 Tateya T, Sakamoto S, Ishidate F, Hirashima T, Imayoshi I, Kageyama R. 2019. Three-  
572 dimensional live imaging of Atoh1 reveals the dynamics of hair cell induction and  
573 organization in the developing cochlea. *Dev*. doi:10.1242/dev.177881
- 574 Thompson DW. 1942. On Growth and Form, Revised ed. ed, On growth and form. Dover  
575 Publications. doi:10.2307/2019330

- 576 Urness LD, Wang X, Doan H, Shumway N, Noyes CA, Gutierrez-Magana E, Lu R, Mansour  
577 SL. 2018. Spatial and temporal inhibition of FGFR2b ligands reveals continuous  
578 requirements and novel targets in mouse inner ear morphogenesis. *Dev.*  
579 doi:10.1242/dev.170142
- 580 Urness LD, Wang X, Shibata S, Ohyama T, Mansour SL. 2015. Fgf10 is required for  
581 specification of non-sensory regions of the cochlear epithelium. *Dev Biol.*  
582 doi:10.1016/j.ydbio.2015.01.015
- 583 Wada H, Matsumoto D. 2018. Twisting Growth in Plant Roots In: Gitmann A, Grill J,  
584 editors. *Plant Biomechanics; From Structure to Function at Multiple Scales*. Springer  
585 International Publishing. pp. pp127-140.
- 586 Wang J, Mark S, Zhang X, Qian D, Yoo SJ, Radde-Gallwitz K, Zhang Y, Lin X, Collazo A,  
587 Wynshaw-Boris A, Chen P. 2005. Regulation of polarized extension and planar cell  
588 polarity in the cochlea by the vertebrate PCP pathway. *Nat Genet.* doi:10.1038/ng1622
- 589 Yamamoto N, Okano T, Ma X, Adelstein RS, Kelley MW. 2009. Myosin II regulates  
590 extension, growth and patterning in the mammalian cochlear duct. *Development.*  
591 doi:10.1242/dev.030718
- 592 Yanakieva I, Erzberger A, Matejčić M, Modes CD, Norden C. 2019. Cell and tissue  
593 morphology determine actin-dependent nuclear migration mechanisms in neuroepithelia.  
594 *J Cell Biol.* doi:10.1083/jcb.201901077
- 595
- 596

## 597 **Materials and Methods**

598

### 599 **(1) Experiments**

#### 600 **Animals**

601 For FRET imaging, we used the transgenic mice that ubiquitously express an ERK biosensor  
602 with a long flexible linker (hyBRET-ERK-NLS) reported elsewhere(Harvey et al., 2008;  
603 Komatsu et al., 2018, 2011) . For simultaneous imaging of F-actin and nuclei, we crossed  
604 Lifeact-EGFP (Riedl et al., 2010) and R26-H2B-mCherry(Abe et al., 2011). Lifeact-EGFP  
605 mice were generously provided by Takashi Hiiragi from EMBL Heidelberg and R26-H2B-  
606 mCherry mice were provided from RIKEN Large (CDB0204K). Otherwise, we used ICR mice  
607 purchased from Japan SLC, Inc. We designated the midnight preceding the plug as embryonic  
608 day 0.0 (E0.0), and all mice were sacrificed by cervical dislocation to minimize suffering. All  
609 the animal experiments were approved by the local ethical committee for animal  
610 experimentation (MedKyo 19090 and 20081) and were performed in compliance with the guide  
611 for the care and use of laboratory animals at Kyoto University.

612

#### 613 **Antibodies**

614 The following primary and secondary antibodies were used for immunofluorescence: anti-E-  
615 cadherin rat antibody (Cell Signaling Technology, #3195, 1:100 dilution), anti-Myosin-VIIa  
616 rabbit polyclonal antibody (Proteus BioSciences Inc., #25-6790, 1:200 dilution), anti-Histone  
617 H3 (phospho S28) rat polyclonal antibody (Abcam, #ab10543, 1:200 dilution), Alexa Fluor  
618 546-conjugated goat anti-rat IgG (H+L) antibody (Thermo Fisher Scientific, #A11081, 1:1000  
619 dilution), Alexa Fluor 647-conjugated goat anti-rabbit IgG (H+L) antibody (Abcam,  
620 #ab150079, or Thermo Fisher Scientific, #A21247, 1:1000 dilution).

621

#### 622 **Small-molecule inhibitors**

623 The following chemicals were used: Mitomycin C (Nacalai Tesque, #20898-21) and  
624 PD0325901 (FUJIFILM Wako Pure Chemical Corporation, #162-25291).

625

#### 626 **Whole-tissue staining and imaging**

627 The cochleae were gently freed from the capsule and the staining and clearing were performed  
628 according to an earlier study (Hirashima and Adachi, 2015). Briefly, the samples were fixed  
629 with 4% PFA in PBS overnight at 4°C and then blocked by incubation in 10% normal goat  
630 serum (Abcam, #ab156046) diluted in 0.1% Triton X-100/PBS (PBT) for 3 h at 37°C. The

631 samples were treated with primary antibodies overnight at 4°C, washed in 0.1% PBT, and  
632 subsequently treated with secondary antibodies conjugated to either Alexa Fluor 546 or Alexa  
633 Fluor 647 overnight at 4°C. For counter staining of nucleus, we mixed Hoechst 33342 (5 µg/ml,  
634 Dojindo Molecular Technologies, #H342-10) or DAPI (Dojindo Molecular Technologies,  
635 #D523-10, 1:200 dilution) . The samples were mounted with 10 µL of 1% agarose gel onto a  
636 glass-based dish (Greiner Bio-One, #627871) for stable imaging. Then, the samples were  
637 immersed with the BABB (benzyl-alcohol and benzyl-benzoate, 1:2, #04520-96 and # 04601-  
638 65, Nacalai Tesque) solution or CUBIC-R+ (Tokyo Chemical Industry Co., # T3741) solution  
639 for optical clearing. Images were acquired using the confocal laser scanning platform Leica  
640 TCS SP8 equipped with the hybrid detector Leica HyD with the ×40 objective lens (NA = 1.3,  
641 WD = 240 µm, HC PL APO CS2, Leica) and the Olympus FluoView FV1000 with the ×30  
642 objective lens (NA = 1.05, WD = 0.8 mm, UPLSAPO30XS, Olympus).

643

#### 644 **EdU assay**

645 For EdU incorporation to embryos, 200 µL of 5 mg/mL EdU in PBS was intraperitoneally  
646 injected to pregnant mice 30 min prior to dissection. For the incorporation to dissected cochleae,  
647 10 µM of EdU was treated into the samples 1 hour prior to the chemical fixation. Before EdU  
648 detection, whole-tissue immunofluorescence of E-cadherin and counter nuclei staining with  
649 DAPI were performed. EdU was detected using the Click-iT® EdU Imaging Kits (Thermo  
650 Fisher Scientific, #C10340). The samples were optically cleared with CUBIC-R+ and images  
651 were acquired by confocal microscopy as described above.

652

#### 653 **Mosaic cell labeling**

654 DNA solutions of the pCAG-GFP vectors (0.7 µg/µL) in PBS with 0.1% Fast Green FCF  
655 (Sigma-Aldrich, #F7252-5G) were injected into the lumen of an inner ear dissected from E13.5  
656 embryos through a fine glass capillary tube under a stereo microscope (SZ61, Olympus). After  
657 injection of DNA solution, the cochlea was sandwiched by a pair of tweezer type electrodes  
658 (Nepa Gene Co., #CUY650P5) and the DNA was electrotransferred using the NEPA21 Super  
659 Electroporator (Nepa Gene Co.). Three 5 msec square pulses (175 V, +) with a 10% decay rate  
660 at intervals of 50 msec were applied as poring pulses, followed by three 50 msec square pulses  
661 (10 V, +/-) with a 40% decay rate at intervals of 50 msec as transfer pulses.

662

#### 663 **Surgical separation**

664 We dissected cochleae from embryos at E17.5 and manually separated a cochlear duct into the

665 medial and lateral side. The images in Movie 3 were acquired using the stereomicroscope  
666 (SZX16, Olympus) with a cooled color CCD camera (DP73, Olympus).

667

### 668 **Explant cultures**

669 We cultured the dissected cochleae without removing the capsule otherwise noted. The  
670 cochleae were mounted on a the 35 mm glass based dish (Iwaki, #3910-035) with 1  $\mu$ L of  
671 growth factor reduced Matrigel (Corning, #356231), and filled with 2 mL of a culture medium  
672 including FluoroBrite DMEM Media (Thermo Fischer Scientific, #A1896701) with 1%  
673 GlutaMAX (Thermo Fischer Scientific, #35050061) and 1% N2 Supplement with Transferrin  
674 (Holo)(FUJIFILM Wako Pure Chemical Corporation, #141-08941). The samples were  
675 incubated at 37°C under 5% CO<sub>2</sub>.

676

### 677 **Live imaging for explants**

678 We used two different sample preparations for live imaging under ex vivo culture condition.  
679 For imaging of MEL, we completely removed the capsule and put the uncovered cochlear duct  
680 attached with spiral ganglion onto the glass-bottom dish whose apex side faces the glass. For  
681 long-term organ-scale imaging, we partially cut off the capsule adjacent to the apex tip of  
682 cochlear duct using tweezers carefully, and the semicircular canals were removed. The isolated  
683 cochlea was put onto the dish as described above. The former method allows us to take images  
684 MEL at single cell resolution but failed to achieve elongation and bending of cochlear duct. In  
685 contrast, the latter method recapitulates the cochlear duct morphogenesis but was unable to  
686 detect fluorescence signals in the medial side. For microscopy, we used an incubator-integrated  
687 multiphoton fluorescence microscope system (LCV-MPE, Olympus) with a  $\times 25$  water-  
688 immersion lens (NA=1.05, WD=2 mm, XLPLN25XWMP2, Olympus) and an inverted  
689 microscope (FV1200MPE-IX83, Olympus) with a  $\times 30$  silicone-immersion lens (NA=1.05,  
690 WD=0.8 mm, UPLSAPO30XS, Olympus). The excitation wavelengths were set to 840 nm,  
691 930 nm, and 1040 nm each for CFP, Lifeact-EGFP, and R26-H2B-mCherry (InSight DeepSee,  
692 Spectra-Physics). Imaging conditions for Lifeact-EGFP and R26-H2B-mCherry were as  
693 follows – scan size: 800 $\times$ 800 pixels, scan speed: 4.0  $\mu$ sec/pixel, IR cut filter: RDM690  
694 (Olympus), dichroic mirrors: DM505 and DM570 (Olympus), and emission filters: BA495-  
695 540 for EGFP and BA575-630 for mCherry (Olympus). Imaging conditions for the FRET  
696 biosensor were as follows – scan size: 800  $\times$  800 pixels, scan speed: 10  $\mu$ sec/pixel, IR cut filter:  
697 RDM690 (Olympus), dichroic mirrors: DM505 and DM570 (Olympus), and emission filters:  
698 BA460-500 for CFP and BA520-560 for FRET detection (Olympus).



699

## 700 **(2) Quantification and Analysis**

701

### 702 **FRET image analysis**

703 Image processing for FRET measurement was described elsewhere (Aoki et al., 2013). Briefly,  
704 the median filter of 3×3 window was processed to remove shot noises, and background signal  
705 was subtracted each in FRET channel and CFP channel. Then, the ratio of FRET intensity to  
706 the CFP intensity was calculated by a custom-made MATLAB (MathWorks) script.

707

### 708 **Measurement of layer curvature and thickness**

709 For 2D measurement of curvature and thickness, we first performed whole-mount  
710 immunofluorescence of E-cadherin to visualize the cochlear epithelium and acquired z-stack  
711 images by confocal microscopy as described above. Next, we manually traced the apical and  
712 basal side of epithelial cells on the middle horizontal section of the roof-floor axis. The  
713 extracted epithelial layer was named as the medial/lateral epithelial layer according to the side  
714 based on a given apex tip point. Then, the curve of the epithelial layer was obtained by the  
715 iterative skeletonization, and discrete points  $(x_i, y_i)$  were sampled along the curves at regular  
716 intervals of 15  $\mu\text{m}$ . Finally, fitting the discrete points with a cubic spline function, the function  
717  $S_i$  at an interval  $[x_i, x_{i+1}]$  is denoted as

718

$$719 \quad S_i(x) = a_i(x - x_i)^3 + b_i(x - x_i)^2 + c_i(x - x_i) + d_i.$$

720

721 Due to a definition of curvature  $\kappa(x) = S''(1 + S'^2)^{-3/2}$ , the curvature from the spline  
722 function was calculated as

723

$$724 \quad \kappa_i(x) = \frac{6a(x - x_i) + 2b}{(1 + \{3a(x - x_i)^2 + 2b(x - x_i) + c\}^2)^{3/2}}.$$

725

726 The curve of the convex/concave to the duct lumen was assigned as positive/negative in  $\kappa$ . We  
727 defined the layer thickness as a linear length connecting to the luminal and basal edge, which  
728 is vertical to the curve of the epithelial layer at sampling points.

729

### 730 **Quantification of nuclear migration**

731 We manually measured the center position of a daughter cell and its luminal and basal edge.

732 Based on the cross point where the luminal-basal line and center line of medial epithelial layer  
733 are intersected, we calculated the arc length from the duct tip to the nuclear position using a  
734 custom built MATLAB code.

735

### 736 **Angle measurement of cell division orientation**

737 First, we performed two-photon live imaging using FV1200MPE-IX83 as described above,  
738 and obtained volumetric images with a depth interval of 3  $\mu\text{m}$ . In each mitotic event, we then  
739 manually measured position (x, y, z) of the two daughter cells 3 hours later after the mitosis in  
740 the fixed coordinate system O of the 3D image. Also, we manually acquired the position of the  
741 luminal and basal edge of the mother cell to define a position (x', y', z') in a local coordinate  
742 system, O', the origin of which is the middle point of the two daughter nuclei. Each orthogonal  
743 basis of the O' coordinate was defined as follows: the apex-base axis in the MEL (x'), the  
744 surface normal of the MEL (y'), i.e., luminal-basal axis in the MEL, and roof-floor axis (z')  
745 orthogonal to both x' and y' according to the right-handed system. With this local coordinate  
746 system, we finally calculated two angles  $\varphi$  and  $\theta$  in the local sphere coordinate resulting from  
747 coordinate transformation from the O into the O' system.

748

### 749 **EdU intensity mapping**

750 First, we separated 8-bit image stacks into two, roof and floor, based on z position at the middle  
751 point, and performed maximum intensity projection onto xy plane both for staining images for  
752 E-cadherin and EdU. Next, we binarized immunostaining signals for E-cadherin using Otsu's  
753 method with morphological operations and detected periphery of the cochlear duct with the  
754 MATLAB function 'bwperim'. With three reference points given manually, i.e., a) the duct tip,  
755 b) the end point of MEL and c) that of LEL, the MEL and LEL curve was each defined by  
756 connecting points between a) and b) and those between a) and c) along the duct periphery.  
757 Then, we marked points to make 20 bins at a constant distance each along the MEL curve and  
758 LEL curve. By connecting the marked point of MEL and that of LEL indexed by an order from  
759 the duct tip and dividing the lines into 10, we partitioned the cochlear duct into small regions  
760 for the measurement. Finally, we measured the averaged intensity of EdU signal within each  
761 region and normalized by 255.

762

### 763 **Tissue flow and ERK activity**

764 To calculate velocity fields of cells in cochleae, we performed particle image velocimetry  
765 (PIV)-based image processing using a free code MatPIV (a GNU public license software

766 distributed by Prof. Kristian Svein in University of Oslo) was applied to time-lapse images of  
767 the CFP channel. Velocity fields at time  $T$  was computed by displacement between  $T$  and  $T+\Delta t$ .  
768  $\Delta t$  was set as the sampling rate, 12 min. The size of the interrogation window was set to 40  
769 pixels, approximately 25  $\mu\text{m}$ , corresponding to 4-5 cell diameter, and the window overlap was  
770 set to 50%. The obtained velocity data were then smoothed via median filtering to eliminate  
771 peaky noises. We then obtained the 'tissue flow speed for the elongation' from PIV velocity  
772 vector projected onto the apex-base line depicted in Figure 4D, and calculated the spatial  
773 derivative of the tissue flow speed for the elongation between two adjacent interrogation  
774 windows on the apex-base line according to the definition of a diagonal component of the strain  
775 rate. This quantity was smoothed using the MATLAB function 'smooth' to eliminate high  
776 frequency components and defined as the extension-shrinkage rate. As for the ERK activity,  
777 we set thresholds in CFP images using Otsu's method within each interrogation window to  
778 extract cytoplasmic region and calculated the mean FRET/CFP ratio in the binarized region.  
779 The ERK activity rate was calculated as the time derivative of the ERK activity. Cross-  
780 correlation analysis was performed using the MATLAB function 'xcorr'.

781

## 782 **Statistical analysis**

783 The number of cells or region of interests analyzed ( $n$ ) and the number of biological replicates  
784 ( $N$ ) are indicated in the figure legends. No particular statistical method was used to  
785 predetermine the sample size. A minimum of  $N=3$  independent experiments were performed  
786 based on previous studies in the field. No inclusion/exclusion criteria were used and all  
787 analyzed samples were included in the analysis. No randomization was performed. Statistical  
788 tests, sample sizes, test statistics, and  $P$ -values were described in the main text.  $P$ -values of less  
789 than 0.05 were considered to be statistically significant in two-tailed tests, and were classified  
790 as 4 categories; \* ( $P<0.05$ ), \*\* ( $P<0.01$ ), \*\*\* ( $P<0.001$ ), and n.s. (not significant, i.e.,  $P \geq$   
791 0.05).

792

## 793 **Software**

794 For digital image processing, we used MATLAB (MathWorks) and Image J (National Institute  
795 of Health). For graphics, we used MATLAB (MathWorks), Imaris (Bitplane) and ImageJ  
796 (National Institute of Health). For statistical analysis, we used MATLAB (MathWorks).

797

## 798 **(3) Mathematical model**

### 799 **A-1. A mechanical model for MEL morphogenesis**

800 We modeled multicellular dynamics within an epithelial layer using a vertex dynamics model  
801 (VDM) (Fletcher et al., 2014; Hirashima and Adachi, 2019; Nagai and Honda, 2001). Here we  
802 focused on two-dimensional section on apex-base and roof-floor axes as shown in Fig. 2A. In  
803 general, the 2D VDM model represents a single cell as a polygon, of which vertices are  
804 elementary points that constitute the cell shape, and a group of cells is regarded as a set of  
805 polygons shared by neighboring cells – we put four vertices, two of which are regarded as an  
806 luminal edge and the other two of which are as a basal edge.

807 In the VDM, the dynamics of position of vertex  $i$ ,  $r_i$ , obey the equation of motion based  
808 on the principle of least potential energy  $U$  as follows:

809

$$810 \quad \eta(\dot{r}_i - v_i) = -\nabla_i U, \quad \text{Eq. 1}$$

811

812 where  $\eta$  is a viscosity coefficient.  $v_i$  is a local velocity of vertex  $i$ , defined as  $\langle v_i \rangle = \langle \dot{r}_{j_i} \rangle_{j_i}$ ,  
813 where  $j_i$  is an index of cells contacting to vertex  $i$ ,  $r_{j_i}$  is a centroid of cell  $j_i$ , and  $\langle \rangle_{j_i}$   
814 denotes averaging in  $j_i$  (Hirashima and Adachi, 2019; Mao et al., 2013; Okuda et al., 2014).

815 For a potential energy as a minimum expression, we defined as

816

$$817 \quad U = \sum_j \left\{ \frac{k_a}{2} (a_j - a_j^*)^2 + \frac{k_b}{2} (b_j - b_j^*)^2 + \frac{k_l}{2} (l_j - l_j^*)^2 + \frac{k_A}{2} (A_j - A_j^*)^2 \right\} + \sum_i \frac{k_\theta}{2} \theta_i^2.$$

818

Eq. 2

819

820 The first to third terms each represent a regulation of cell edge length in luminal/apical, basal,  
821 and lateral side with controlling parameters  $(k_a, k_b, k_l)$ , current length  $(a_j, b_j, l_j)$ , and the  
822 target length  $(a_j^*, b_j^*, l_j^*)$ . Target edge length of the luminal/apical and that of basal side are a  
823 function of nuclear position within the epithelial layer, described later. The fourth term  
824 represents cell area preservation with its coefficient  $k_A$ , current cell area  $A_j$ , and the target cell  
825 area  $A_j^*$ . The fifth term represents bending energy of the luminal/apical side and that of basal  
826 side attributed to each vertex;  $k_\theta$  denotes the bending rigidity and  $\theta_i$  is an angle of  
827 luminal/apical edge or that of basal edge at a vertex  $i$ . Although the cell shape is relatively  
828 flexible in a pseudostratified epithelial tissue, this model framework is valid as several  
829 biological features can be incorporated, such as the nuclear position-dependent edge regulation  
830 and cell size preservation.

831 Each cell has a unique cell cycle, length of which  $\tau_{div}$  is assumed to be equally assigned  
832 to all cells. We assume that a period of each cell cycle phase (G1, S, G2, and M) is partitioned

833 as 11:8:4:1, and a cell cycle status or timer  $\tau_j$ , origin of which is defined at the end of cell  
 834 division, i.e., a boundary of M-G1, is provided according to the distribution of cell cycle phase.  
 835 We model that the cell timer  $\tau_j$  in the cycle determines the distance from the luminal side of  
 836 a cell, i.e., nuclear position  $d_j$  ( $0 \leq d_j \leq 1$ ), with a parameter  $\gamma$  as follows:

$$837 \quad d_j = \begin{cases} 2\gamma\tau_j/\tau_{div} & (0 < \tau_j \leq 0.5\tau_{div}) \\ (-\tau_j/\tau_{div} + 0.95)\gamma/0.45 & (0.5\tau_{div} < \tau_j \leq 0.95\tau_{div}) \\ 0 & (0.95\tau_{div} < \tau_j \leq \tau_{div}). \end{cases} \quad \text{Eq. 3}$$

839  
 840 This means that nuclei move toward the basal side of cell during G1-S phase with a degree  $\gamma$   
 841 and get close to the luminal side before entering M phase. Of note,  $\gamma$  controls the degree of  
 842 basalward movement as described in the main text. Once a cell divides,  $\tau_j$  in one of daughter  
 843 cells reset to zero and one in the other is set to a value stochastically chosen from 0 to  $0.1\tau_{div}$   
 844 with a uniform distribution to avoid perfect synchronization between neighboring cells.

845 Occupied cell area is dominant in the medial epithelial layer and the cell position along  
 846 the luminal-basal axis should regulate the length of luminal edge and that of basal edge. Thus,  
 847 we define the target length as the simplest linear function of the nuclear position with two  
 848 parameters  $\xi_{max}$  and  $\xi_{min}$  as follows:

$$849 \quad a_j^* = (\xi_{min} - \xi_{max})d_j + \xi_{max},$$

$$850 \quad b_j^* = (\xi_{max} - \xi_{min})d_j + \xi_{min}. \quad \text{Eq. 4}$$

851

852

## 853 **A-2. Numerical simulation**

854 The ordinary differential equations were numerically solved by the forward Euler method with  
 855 time step 0.01. The code was generated with MATLAB (MathWorks). Regarding initial  
 856 condition, 20 rectangular cells, width/height of each which is 2.5/50  $\mu\text{m}$ , are arrayed along a  
 857 horizontal line. Standard parameter set is  $\eta = 1$ ,  $k_A = 0.01$ ,  $a_j^* = 125 [\mu\text{m}^2]$ ,  $k_a = 1$ ,  
 858  $k_b = 1$ ,  $k_l = 1$ ,  $k_\theta = 30$ ,  $l_j^* = 50 [\mu\text{m}]$ ,  $\tau_{div} = 432$ ,  $\gamma = 0.9$ ,  $\xi_{max} = 5 [\mu\text{m}]$ ,  $\xi_{min} =$   
 859  $1 [\mu\text{m}]$ , otherwise noted.  $a_j^*$ ,  $l_j^*$ ,  $\gamma$ ,  $\xi_{max}$ , and  $\xi_{min}$  were determined from obtained images,  
 860 and other parameters were determined empirically with some observations; at first,  $\eta$ ,  $k_a$ ,  $k_b$ ,  
 861 and  $k_l$  were set to 1 and then  $k_A$ ,  $\tau_{div}$ , and  $k_\theta$  were determined to reproduce the MEL  
 862 curvature observed in the curvature experimentally. Note that relative values rather than  
 863

864 absolute ones are critical for the dynamics.

865

### 866 **A-3. Detailed setting in virtual experiments for cell cycle arrest**

867 For an investigation towards mimicking the developmental process, we introduced luminal  
868 stalling region, defined with an arclength along the epithelial layer  $L$  originated from the  
869 boundary of apex side. Assuming once the cells in the luminal stalling region undergo division,  
870 the daughter cells' timer  $\tau_j$  do not count up, meaning that those nuclei stay at the luminal side  
871 without reentering the cell cycle. This is due to experimental observations in which daughter  
872 cells do not undergo mitosis exclusively in the curved region within a short time scale, at least  
873 our observation window. For the cells in the non-luminal stalling region,  $\tau_{div}$  was set  
874 stochastically chosen from a uniform distribution from 216 to 864 each after the cell division  
875 to incorporate variability and asynchronicity in nuclear dynamics. To recapitulate the  
876 mitomycin C treatment in simulation, the cell cycle was arrested if the cell timer  $\tau_j$  was ranged  
877 in  $0.25\tau_{div}$  to  $0.8\tau_{div}$ , corresponding to the mid G1 phase to the end of S phase, when the  
878 simulation time exceeded 700. For the control case, we evaluated the curvature of virtual MEL  
879 when the cell number reached at 100. For the case of mitomycin C treatment, we evaluated  
880 when the simulation time reached at 1300 because the averaged simulation time in the control  
881 case was 1298 (n=10).

882

883

### 884 **B-1. Modeling oscillatory ERK activation waves and cell flows**

885

886 We built a minimal 1D mechano-chemical coupling model for the collective cell migration  
887 based on our previous studies (Boocock et al., 2020; Hino et al., 2020). Cells, each indexed as  
888  $j=1,\dots,N$ , are represented as a chain of springs, whose junctions including the boundaries are  
889 labeled as  $i=1,\dots,N+1$ , with elastic constant  $k$  and each cell generates contractile force at the  
890 rear side of the cell to move to the front with a force  $F$ . *i.e.*, the cell contractile force with  $j=N$   
891 ( $F_{j=N}$ ) is regarded as the force at the junction  $i=N$  ( $F_{i=N}$ ). Because the epithelial cells adhere to  
892 neighboring cells and thus transmit the elastic force with viscous frictions  $\eta_c$ , the dynamics of  
893 cell collectives is represented as

894

$$895 \quad \eta_c \dot{x}_i = k(\varepsilon_j - \varepsilon_{j+1}) + F_{j=i},$$

$$896 \quad \varepsilon_j = (x_{i+1} - x_i)/L - 1, \quad \text{for } i = 1,\dots,N \quad \text{and} \quad j = 1,\dots,N \quad \text{Eq. 5}$$

897

898 where  $\varepsilon$  is a cell strain and  $L$  is a typical cell length, i.e., 5  $\mu\text{m}$ . At the front edge of the cells,  
899 i.e.,  $i=N+1$ , a self-propelling force  $F_{tip}$  is generated, reflecting an elongation of the duct tip.  
900 Since the cells respond to stretching as activating the ERK, a coupling between the cell  
901 kinematics and the ERK activity is formulated as

902

$$903 \quad \eta_E \dot{E}_j = \tanh(\alpha \varepsilon_j) - E_j, \quad \text{Eq. 6}$$

904

905 where  $\alpha$  denotes a sensitivity parameter and  $\eta_E$  denotes a timescale of the dynamics. Then,  
906 the ERK activity is converted to the self-contractile force represented as dynamics of the

907

$$908 \quad \eta_F \dot{F}_j = \lambda E_j - F_j, \quad \text{Eq. 7}$$

909

910 where  $\lambda$  denotes a controlling parameter of amplitude, and  $\eta_F$  denotes a timescale.

911 As for the uncoupling regime, ERK activity was given as the following traveling waves  
912 instead of Eq. 6:

913

$$914 \quad E(X) = \left( \sin\left(\frac{\pi X}{w} + vt\right) + 1 \right) \times 0.5, \quad \text{Eq. 8}$$

915

916 where  $w$  is the characteristic length of ERK activation and  $v$  is the ERK activation speed.

917 The parameters  $w$  was set as 84  $\mu\text{m}$ , i.e., the wavelength of the ERK activity is 168  $\mu\text{m}$ , from  
918 Figure 4E and  $v$  was set as 0.42  $\mu\text{m min}^{-1}$  from Figure 4F.

919

## 920 **B-2. Numerical simulation**

921 The ordinary differential equations were numerically solved by the forward Euler method with  
922 time step 0.01 using the MATLAB. The number of cells  $N$  was set as 1000 and the one  
923 boundary  $i=1$  was fixed and the other  $i=N+1$  was the moving boundary condition. Biologically  
924 plausible parameter set was determined as  $\eta_c = 40$  [nN min  $\mu\text{m}^{-1}$ ],  $k = 20$  [nN],  $F_{tip} = 6$  [nN],  
925  $\alpha = 3$ ,  $\eta_E = 30$  [min],  $\eta_F = 10$  [min], and  $\lambda = 9$  [nN] according to the present study and a  
926 previous study (Serra-Picamal et al., 2012).

927

928

929

930 **Supplementary figure legends**

931

932 **Figure S1 Morphological quantification of epithelial layer**

933 Curvature and thickness as a function of the arc length from the tip along the lateral epithelial  
934 layer (LEL, left) and the medial epithelial layer (MEL, right) at E13.5 to E15.5. Mean  $\pm$  s.d.  
935 N=3.

936

937 **Figure S2 Luminal-basal nuclear movement in the MEL**

938 (A) Numerical investigation of the mathematical model. The curvature is plotted over  $\gamma$ . Mean  
939  $\pm$  s.d. N=10. (B) Treatment of cochlea with 10  $\mu$ M mitomycin C for 1 day. Maximum intensity  
940 projection of immunostained images for the anti-E-cadherin (white) and EdU labelling  
941 (magenta). Scale bar, 100  $\mu$ m.

942

943 **Figure S3 ERK activity waves and cell flows**

944 (A) Roof plane (orange dotted line) in the cross section view of 3D ERK activity map in the  
945 cochlea at E12.5. Scale bar, 50  $\mu$ m. (B) Time-lapse snapshots of ERK activity map in the roof  
946 plane. Time indicates the elapsed time of live imaging. Scale bar, 100  $\mu$ m. (C) Time-lapse  
947 snapshots of tissue flow speed obtained by the PIV in the roof plane. The multicellular flows  
948 direct toward the elongation direction around the duct tip despite winding in the region away  
949 from the tip in the roof side. Scale bar, 100  $\mu$ m. (D) Kymograph of ERK activity for the two  
950 samples. Horizontal axis indicates the position on the apex-base line and vertical axis indicates  
951 the elapsed time of live imaging. Dotted lines represent the oscillatory wave trains from the  
952 apex to the base. Scale bar, 100  $\mu$ m. (E) Time-series data of ERK activity and the tissue flow  
953 speed for elongation in the three different ROIs. (F) ERK activity before and after the MEK  
954 inhibitor PD0325901 treatment at 1  $\mu$ M. Scale bar, 20  $\mu$ m.

955

956 **Figure S4 Mathematical model for ERK activation waves and cell flows**

957 (A, A') Schematics for two regimes. ERK activity and cell deformation is reciprocally regulated  
958 in the mechano-chemical coupling regimes (A), but is unidirectionally regulated from the ERK  
959 activity to the cell deformation without closed feedbacks in the uncoupling regime (A'). (B, B')  
960 Kymograph of the ERK activity. In the mechano-chemical coupling regime, the ERK activity  
961 propagation from the apex to the base can be generated (B), even without given ERK wave as  
962 shown in the uncoupling regime (B'). Scale bar, 100  $\mu$ m. (C, C') Time-series of ERK activity  
963 rate and extension-shrinkage rate in the coupling (C) and the uncoupling regime (C'). (D, D')



964 Cross-correlation between the extension-shrinkage rate and the ERK activity rate in the  
965 coupling (D) and the uncoupling regime (D'). The lag time in (D) is -28 min, compatible with  
966 the experiments, while the lag time in (D') is -2 min, almost no lag time.

967

968

969

970

971 **Movie legends**

972 **Movie S1 Real-time movie showing surgical separation of the cochlear duct at E17.5,**  
973 **related to Figure 1.**

974 After separation, the medial and lateral tissue are placed on the left and the right, respectively.

975 Note that the medial tissue remains curled even after being straightened.

976

977 **Movie S2 Time-lapse movie of MEL in the cochlear duct at E14.5, related to Figure 2.**

978 Representative nuclei are labelled when those reach at the luminal surface. Green and magenta

979 each denote the nucleus in the flat region and in the curved region. Time interval is 5 min.

980

981 **Movie S3 Model simulation for cell cycle arrest, related to Figure 2.**

982 Color in the epithelial layer indicates the curvature and that in the circles indicate the cell cycle

983 state. Interkinetic nuclear migration is stopped at a timing of cell cycle arrest shown in the right

984 panel.

985

986 **Movie S4 3D ERK activity map of the cochlear at E12.5, related to Figure 4.**

987 Color indicates the ERK activity level shown in Figure 4A. Views from roof side at initial, and

988 ones from apex side at last.

989

990 **Movie S5 Time-lapse movie of the ERK activity and multicellular tissue flow, related to**  
991 **Figure 4.**

992 Color in the left panel indicates the ERK activity level shown in Figure 4B and that in the right

993 panel indicates the PIV speed shown in Figure 4C. Views at the floor plane indicated in Figure

994 4A'. Time intervals is 12 min.

995

996 **Movie S6 3D time-lapse imaging of ERK activity in the lateral side of the cochlear duct**  
997 **at E12.5, related to Figure 4.**

998 Color indicate the ERK activity level shown in Figure 4J. Views from the lower left corner of

999 Figure 4B. Green arrow indicates the ERK activation peak.

1000

Figure 1

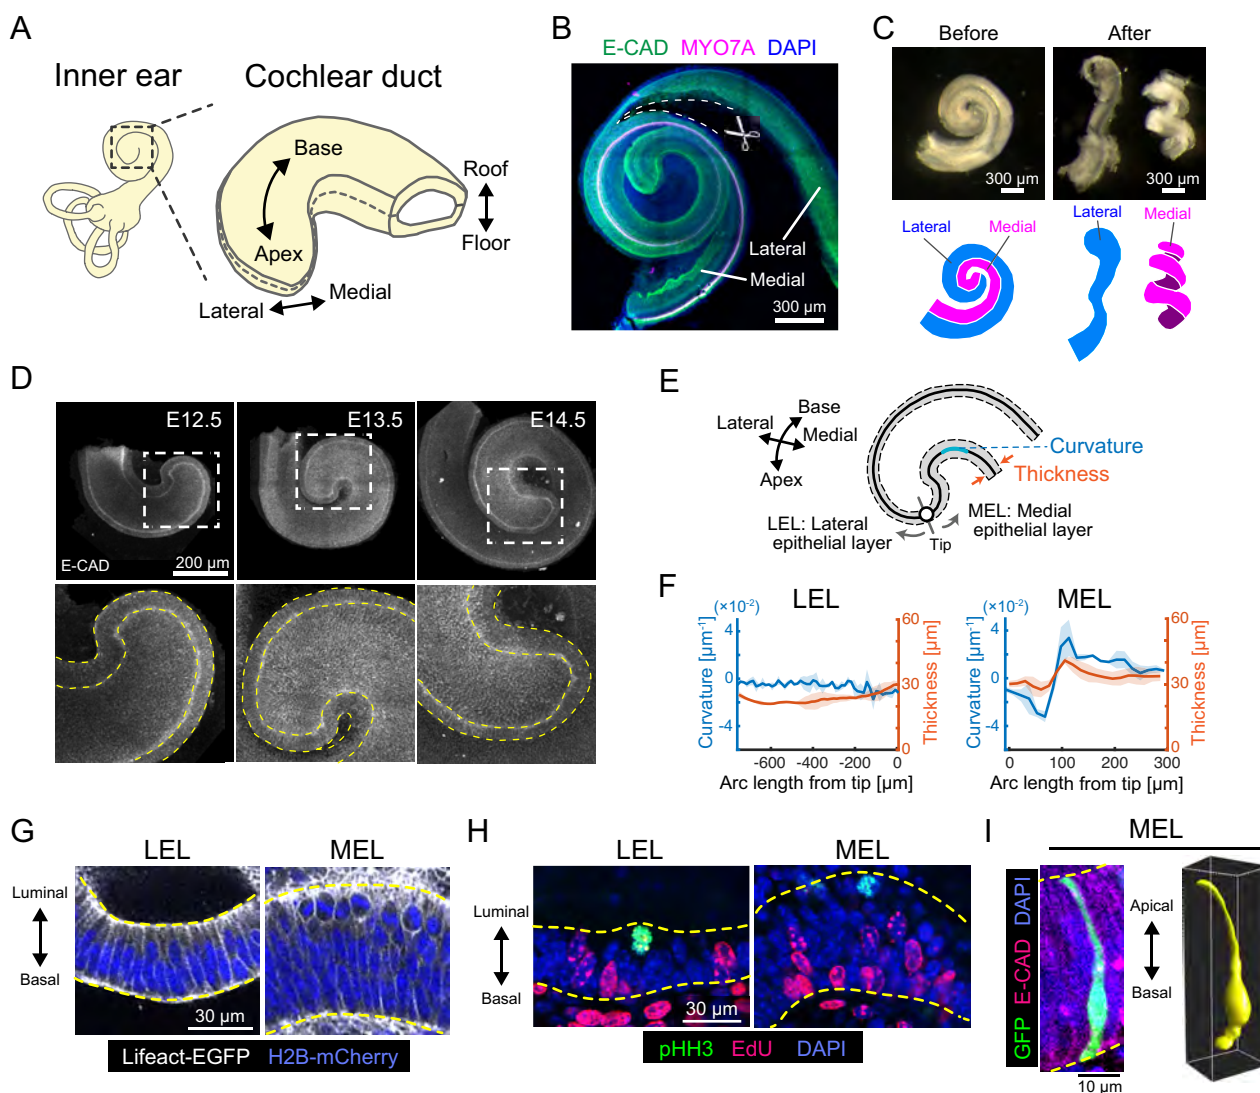

Figure 2

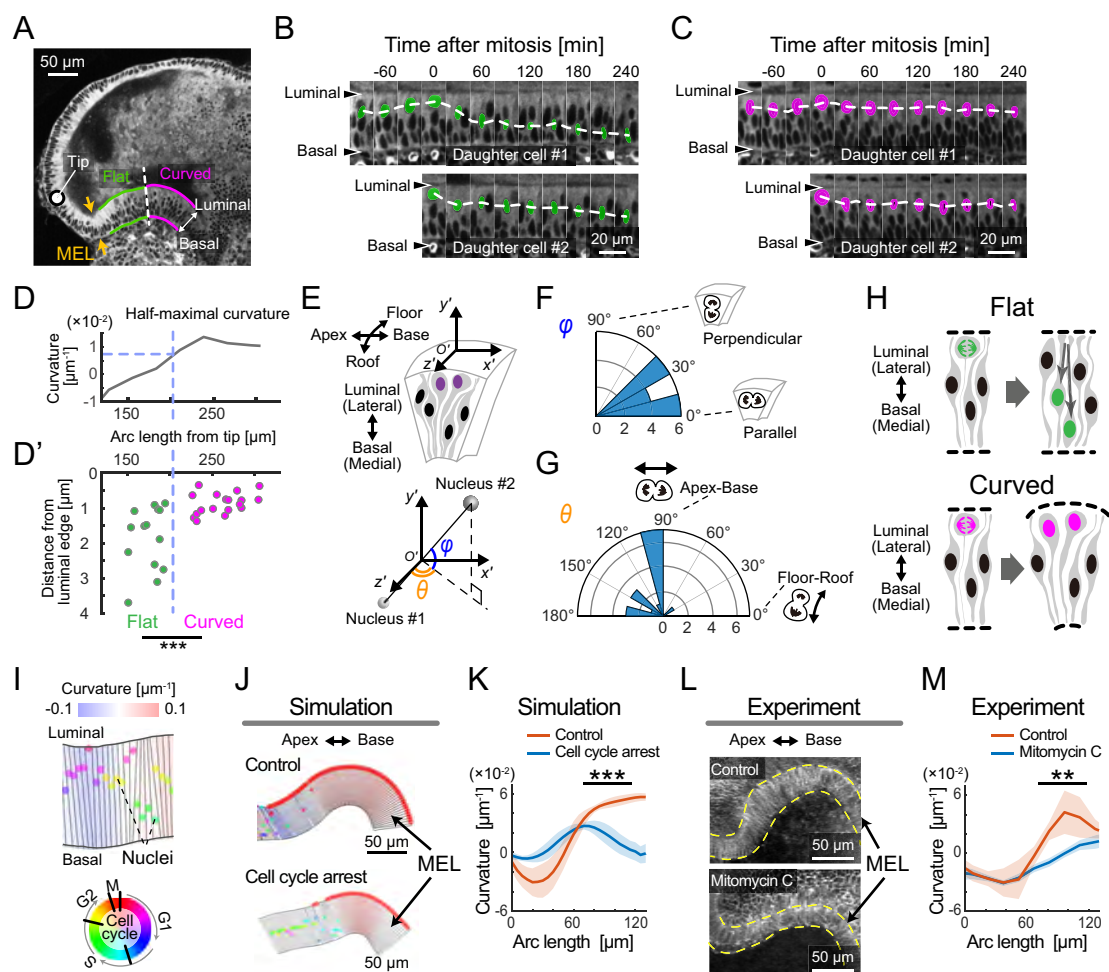

Figure 3

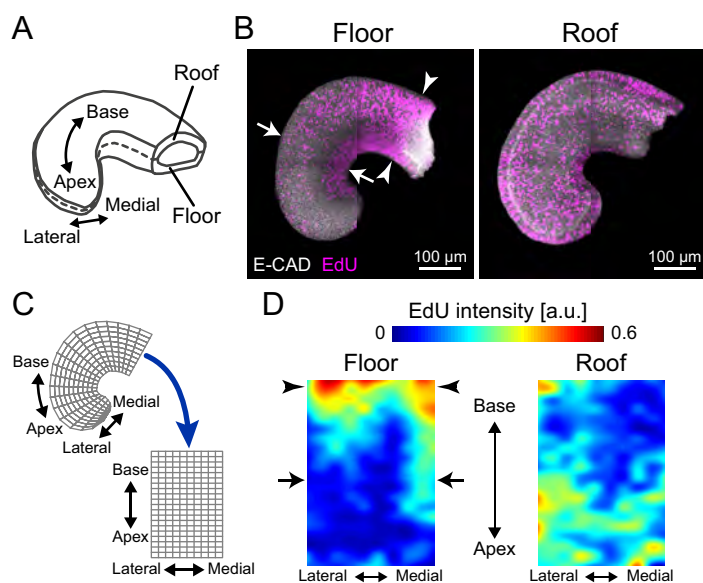

Figure 4

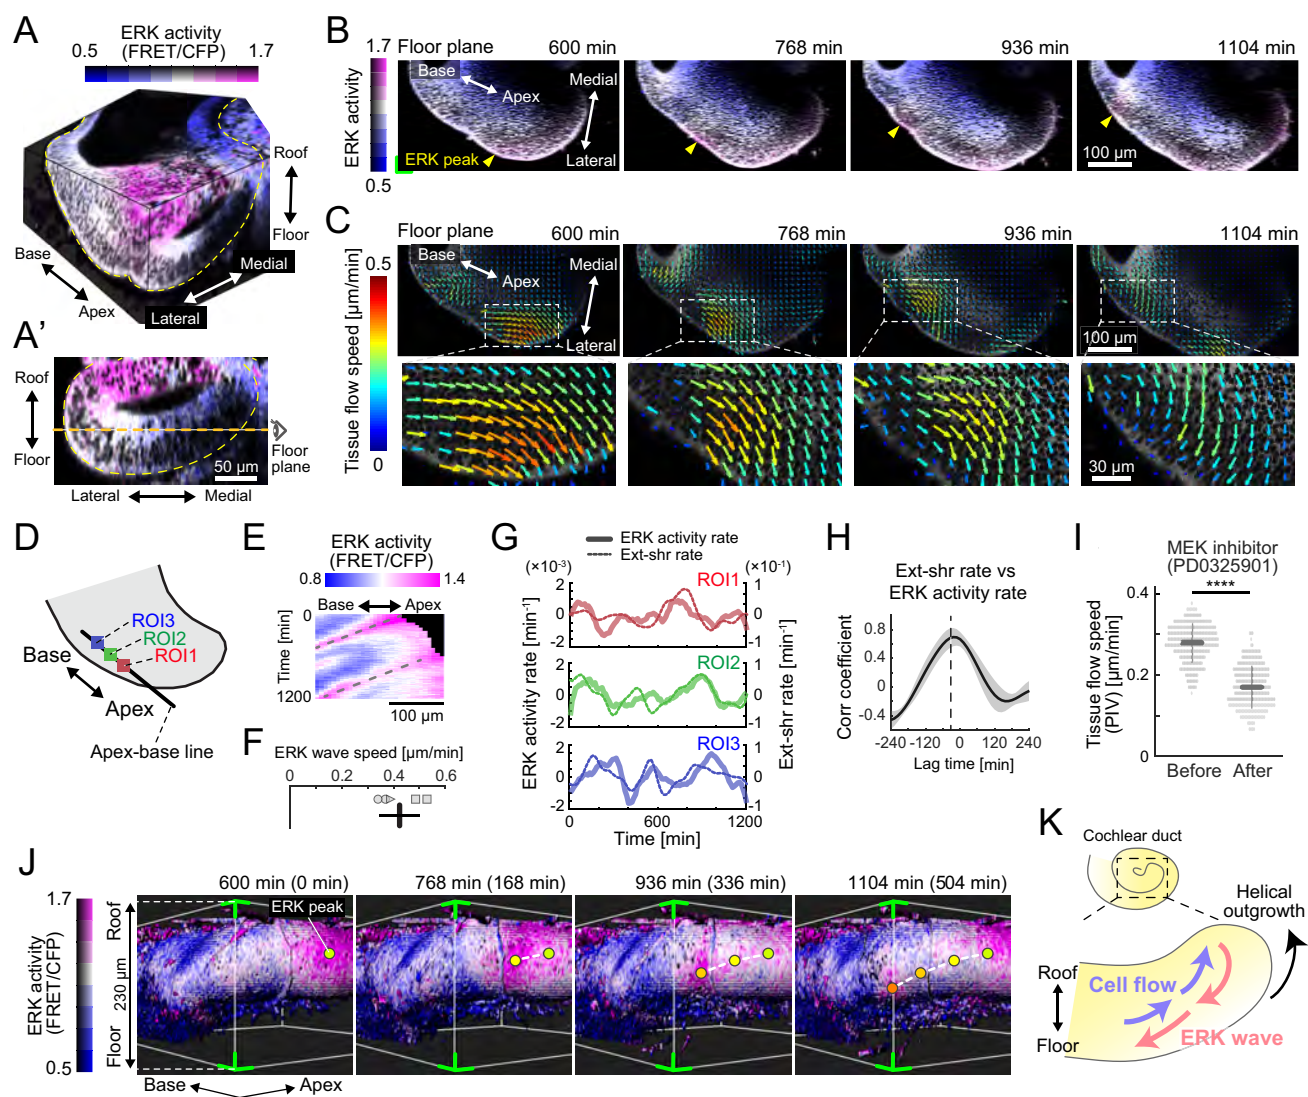

Source: https://www.biorxiv.org/content/10.1101/2020.07.24.219469v2.full.pdf
